# 1 **Systematic protein complex profiling and differential analysis from co-** 2 **fractionation mass spectrometry data**

3  
4 Andrea Fossati<sup>1,2,†</sup>, Chen Li<sup>1,3,†,\*</sup>, Peter Sykacek<sup>4</sup>, Moritz Heusel<sup>5</sup>, Fabian Frommelt<sup>1</sup>, Federico Uliana<sup>1</sup>,  
5 Mahmoud Hallal<sup>6</sup>, Isabell Bludau<sup>1,7</sup>, Capraz Tümay Klemens<sup>4</sup>, Peng Xue<sup>1,8</sup>, Anthony W. Purcell<sup>3</sup>,  
6 Matthias Gstaiger<sup>1,\*</sup>, and Ruedi Aebersold<sup>1,9,\*</sup>

7  
8 <sup>1</sup>Department of Biology, Institute of Molecular Systems Biology, ETH Zürich, Switzerland;  
9 <sup>2</sup>Department of Biology, Institute of Molecular Health Sciences, ETH Zürich, Switzerland;  
10 <sup>3</sup>Department of Biochemistry and Molecular Biology and Infection and Immunity Program,  
11 Biomedicine Discovery Institute, Monash University, VIC 3800, Australia; <sup>4</sup>Department of  
12 Biotechnology, BOKU University, Vienna, Austria; <sup>5</sup>Division of Infection Medicine (BMC),  
13 Department of Clinical Sciences, Lund University, Sweden; <sup>6</sup>Department for BioMedical Research,  
14 University of Bern, Switzerland; <sup>7</sup>Department of Proteomics and Signal Transduction, Max Planck  
15 Institute of Biochemistry, Martinsried, Germany; <sup>8</sup>Institute of Biophysics, Chinese Academy of  
16 Sciences, Beijing, China; <sup>9</sup>Faculty of Science, University of Zürich, Switzerland.

17  
18 †These two authors contributed equally to this work.

19 \*To whom correspondence should be addressed.

20

## 21 **Abstract**

22 Protein complexes, macro-molecular assemblies of two or more proteins, play vital roles in numerous  
23 cellular activities and collectively determine the cellular state. Despite the availability of a range of  
24 methods for analysing protein complexes, systematic analysis of complexes under multiple conditions  
25 has remained challenging. Approaches based on biochemical fractionation of intact, native complexes  
26 and correlation of protein profiles have shown promise, for instance in the combination of size  
27 exclusion chromatography (SEC) with accurate protein quantification by SWATH/DIA-MS. However,  
28 most approaches for interpreting co-fractionation datasets to yield complex composition, abundance  
29 and rearrangements between samples depend heavily on prior evidence. We introduce PCprophet, a  
30 computational framework to identify novel protein complexes from SEC-SWATH-MS data and to  
31 characterize their changes across different experimental conditions. We demonstrate accurate  
32 prediction of protein complexes (AUC >0.99 and accuracy around 97%) via five-fold cross-validation  
33 on SEC-SWATH-MS data, show improved performance over state-of-the-art approaches on multiple  
34 annotated co-fractionation datasets, and describe a Bayesian approach to analyse altered protein-protein  
35 interactions across conditions. PCprophet is a generic computational tool consisting of modules for  
36 data pre-processing, hypothesis generation, machine-learning prediction, post-prediction processing,  
37 and differential analysis. It can be applied to any co-fractionation MS dataset, independent of separation  
38 or quantitative LC-MS workflow employed, and to support the detection and quantitative tracking of  
39 novel protein complexes and their physiological dynamics.

## 40 **Main**

41 The analysis of proteins has progressed from studying specific proteins to the comparative analysis of  
42 multiple proteomes, allowing for the detection of changes in the proteome landscape as a function of  
43 the cellular state and the identification of connections between proteins based on their behaviours across  
44 multiple samples. However, proteins largely function as complexes which are involved in performing  
45 and regulating a majority of biological functions<sup>1-4</sup>. Protein complexes are a part of extended functional  
46 groups, such as pathways or protein interaction networks. Despite the availability of a range of methods  
47 for the analysis of specific protein complexes, systematic analysis of the ensemble of protein complexes  
48 in a sample has remained challenging<sup>5</sup>. While affinity-purification mass spectrometry (AP-MS)  
49 provides valuable biological information on protein complexes, it lacks scalability and requires either  
50 genetic manipulation of cells for introduction of a tag or the use of antibody-based reagents. On the  
51 other hand, biochemical fractionation mass spectrometry allows for simultaneous quantification of  
52 thousands of proteins and is emerging as a powerful technique for system-wide investigation of protein  
53 complexes. Analytical techniques such as size exclusion chromatography (SEC) and ion exchange  
54 chromatography (IEX) have been successfully applied in a variety of complex biological questions  
55 such as apoptosis-dependent complex rewiring<sup>6</sup>, characterization of novel complexes in *Trypanosoma*  
56 *Brucei*<sup>7</sup> and *C. Elegans*<sup>8</sup>, identification of isoform-specific complexes<sup>9</sup> and differential analysis of cell  
57 cycle states<sup>17</sup>, i.e. the interphase and mitosis.

58 A key challenge in fractionation-based approaches is the confident assignment of protein  
59 subunits to protein complexes based on their co-fractionation patterns and other relevant biological  
60 information. A number of computational frameworks have been proposed for this purpose<sup>8, 10-12</sup>.  
61 Among these methods, CCprofiler identifies protein complexes from co-fractionation proteomic data  
62 based on prior information from reference complex/interactome databases such as CORUM<sup>13</sup>,  
63 STRING<sup>14</sup> and BioPlex<sup>15, 16</sup>. CCprofiler was not designed to predict novel protein complexes but to  
64 determine a confidently detectable set of complexes including statistical estimation and control of the  
65 false discovery rate<sup>10</sup>. PrInCE and EPIC leverage machine-learning techniques to predict novel protein  
66 complexes but are limited conceptually to the inference of protein-protein interactions (PPI) from co-

67 fractionation proteomic data. Finally, dendrogram clustering has been described for novel complex  
68 identification<sup>11</sup>. In this case as well, control of false positives and false negatives is challenging since  
69 an arbitrary threshold must be applied to cut the dendrogram<sup>11</sup>.

70 In this study, we describe PCprophet, an open-access software for protein complex prediction  
71 directly from co-fractionation-MS data using machine-learning techniques and differential analysis of  
72 complex abundance and assembly state across conditions. PCprophet combines the benefits from  
73 previous approaches such as error rate control using database-derived complexes present in CCprofiler  
74 with the discovery of novel complexes inherent in other approaches. PCprophet offers the following  
75 features: (i) PCprophet accepts input from a variety of co-fractionation mass-spectrometry (coFrac-MS)  
76 techniques, including but not limited to size-exclusion chromatography (SEC-MS), strong cationic  
77 exchange (SCX), and blue native page (BNP); (ii) PCprophet can be used with inputs derived from  
78 widely employed mass spectrometry acquisition schemes such as data dependent acquisition (DDA),  
79 data independent acquisition (DIA) and different quantitation strategies such isobaric labelling (SILAC,  
80 TMT) or label-free; (iii) PCprophet was trained using co-eluting protein complex data, rather than co-  
81 eluting PPIs, and can therefore directly predict novel protein complexes (i.e. complex-centric  
82 prediction); (iv) PCprophet performs post-prediction processing via a statistical error model based on  
83 Gene Ontology scores and other criteria to improve the reliability of the predicted protein complexes  
84 and reduce false positives; (v) PCprophet performs differential analysis of predicted protein complexes  
85 across conditions using our newly proposed Bayesian inference-based method. We applied PCprophet  
86 to predict and analyse protein complexes in different cell cycle phases using our recently published  
87 SEC-SWATH-MS dataset in the HeLa cell line<sup>17</sup>. Our results demonstrate that PCprophet predicts  
88 novel protein complexes and recapitulates known changes in protein complexes across the cell cycle.

89

## 90 **Results**

### 91 **PCprophet accurately identifies novel protein complexes from co-fractionation MS data**

92 PCprophet enables accurate prediction of protein complexes directly from raw input (i.e. protein  
93 matrices consisting of protein intensity vs. fraction number) of SEC-SWATH-MS and other co-

94 fractionation data. The framework of PCprophet (**Fig. 1**) includes six major modules: data pre-  
95 processing, database query and *de novo* complex (i.e. hypothesis) generation, feature calculation and  
96 prediction, error estimation and post-prediction processing, complex-centric differential analysis, and  
97 report generation and data visualisation. During the data pre-processing step, Gaussian filtering,  
98 missing value imputation, linear interpolation and data resizing are performed to ensure data quality  
99 (See ‘**Methods**’ for more details). During the hypothesis generation step, a list of candidate protein  
100 complexes for each condition based on the raw input protein matrices is provided separately via peak-  
101 picking and distance-based clustering, for the machine-learning model to predict. During feature  
102 calculation and prediction, each protein complex delivered by the hypothesis generation procedure is  
103 represented using a numeric vector, including average intensity difference of proteins within each  
104 fraction, local correlation of proteins at each window, shift of apex fraction of each protein and average  
105 full width of a peak at half maximum. Meanwhile, the provided database (either PPI or complexes) is  
106 mapped in the same feature space for later being used for FDR control. Then the Random Forest models  
107 predict potential protein complexes with detailed predicted probabilities. During error estimation and  
108 post-prediction processing, PCprophet filters the predictions based on Gene Ontology (GO) terms  
109 assigned to components of predicted complexes. By calculating the pairwise GO term semantic  
110 similarities of proteins assigned to a complex and comparing them to similarity scores in reference  
111 databases of known protein complexes, PCprophet filters predicted complexes by a local false  
112 discovery rate (FDR) based on GO term semantic similarity. In addition, PCprophet performs complex  
113 combination and collapsing, since hypothesized complexes might be a subset of a bigger complex or a  
114 mix of multiple complexes. During the complex-centric differential analysis, PCprophet analyses the  
115 differences in prediction results between conditions, from protein level to complex level, using a  
116 Bayesian inference method. As the final output, tabular and visual reports of the predicted protein  
117 complexes and their changes across different conditions are generated by PCprophet. In summary,  
118 PCprophet provides a ‘one-stop’ computational framework for the confident detection of protein  
119 complexes including their dynamic changes across different biological states from a wide range of  
120 coFrac-MS data.

121

122 **Benchmarking PCprophet complex prediction against state-of-the-art methods**

123 Concluding from the five-fold cross-validation (refer to ‘**Supplementary Results**’ for more details),  
124 Random Forest (RF) has been chosen as the core classification algorithm of PCprophet. We then  
125 assessed the performance of complex predictions using the optimized PCprophet framework against  
126 two different, state-of-the-art computational approaches for the detection of protein complexes from  
127 co-fractionation data, namely CCprofiler<sup>10</sup> and EPIC<sup>8</sup>. Similar to PrInCE<sup>12</sup>, EPIC supports the  
128 prediction of binary protein-protein interactions and network inference of underlying complexes,  
129 maintaining the potential to discover previously unknown complexes. Out of these two interaction-  
130 centric approaches, we selected EPIC for our performance comparison as it has been shown to  
131 outperform previous tools such as PrInCE. We benchmarked these tools based on a recently published  
132 dataset, where HeLa CCL2 cells were synchronized in distinct cell-cycle stages (i.e. interphase and  
133 mitosis) prior to analysis by SEC and DIA/SWATH-MS<sup>17</sup>. To avoid biases in assessing performance  
134 due to the different inputs required by these tools (CCprofiler mainly takes the peptide-level  
135 quantitative values as input, whereas PCprophet and EPIC take as input the protein-level quantitative  
136 values), we performed sibling peptide correlation using CCprofiler and exported the resulting protein  
137 matrices, thereby providing the same input for all benchmarked tools (refer to ‘**Methods**’ for more  
138 details). To minimize comparison bias due to parameter optimization, we ran CCprofiler with the  
139 parameters used in its original publication<sup>10</sup>. EPIC, on the other hand, offers the possibility of choosing  
140 between an SVM classifier or an RF classifier for PPI prediction. We used default parameters with both  
141 classifiers, generating two sets of predictions (EPIC\_SVM and EPIC\_RF). We generated protein  
142 complex hypotheses for CCprofiler using the CORUM core complexes dataset, and also trained EPIC  
143 using CORUM. PCprophet requires a protein complex or PPI database as input to perform FDR control  
144 and CORUM was used for this purpose as well.

145 We initially evaluated the performance of each method using the numbers of known CORUM  
146 complexes recovered across all replicates and conditions. Both the absolute number of identified  
147 complexes as well as the overall recall are vastly different for each tool. The complex-centric tools (i.e.

148 PCprophet and CCprofiler) identified 900 and 798 known complexes respectively; while EPIC\_RF  
149 recovered only 71 known complexes and EPIC\_SVM recovered none (**Fig. 2a**). The overlap in known  
150 complexes between PCprophet and CCprofiler was 69.7% (i.e. 556 out of 798), while 49.2% (i.e. 35  
151 out of 71) overlap was achieved between PCprophet and EPIC\_RF (**Fig. 2b**). The identified complexes  
152 correspond to a recall rate of 37% for PCprophet, 33% for CCprofiler and 3% for EPIC\_RF. PCprophet  
153 recalls a much higher fraction of CORUM complexes compared to those recalled by EPIC analysis also  
154 in a DDA-based dataset with a isotope dilution strategy for quantification<sup>18</sup> (DDA-SILAC,  
155 **Supplementary Fig. S1**). We then compared the average number of subunits per complex to evaluate  
156 the similarity of known complexes from CORUM to the predicted ones from EPIC and PCprophet (**Fig.**  
157 **2c**). The distribution of subunits per complex predicted by PCprophet and CCprofiler is closer to that  
158 of CORUM complexes (average 4.1 subunits), with an average subunit size of 3.5 for PCprophet and  
159 6.9 for CCprofiler. The average subunit size per complex predicted by EPIC, however, was 19.9  
160 ( $p < 10E-14$ ) for the RF classifier and 71.7 ( $p < 10E-14$ ) for the SVM classifier, respectively. The results  
161 from EPIC thus suggest a larger size of cellular assemblies compared to the sizes of manually curated  
162 complexes in the CORUM database, with more similar sizes reported by both CCprofiler and  
163 PCprophet.

164 We then evaluated the performance of PCprophet and EPIC in recalling protein-protein  
165 interactions (PPIs). In this comparison, we did not consider CCprofiler as it cannot derive novel  
166 complexes without prior information, which limits its applicability for discovery of novel protein-  
167 protein interactions. We generated a PPI network from complexes predicted by PCprophet, EPIC\_RF,  
168 and EPIC\_SVM, and compared them to ground truth networks from CORUM complexes and from PPI  
169 databases such as STRING and BioPlex. This comparison allows to calculate the percentage of reported  
170 PPIs for each tool, in the form of PPI precision. PCprophet achieved a PPI precision of 0.65 when  
171 compared with STRING and 0.095 in comparison to BioPlex database (**Fig. 2d**). The precision of  
172 EPIC\_RF was 0.12 with STRING and 0.004 when compared with PPIs in BioPlex. EPIC\_SVM  
173 prediction corresponded to a precision of 0.11 and 0.002 with STRING and BioPlex respectively. We  
174 calculated for each network the degree distribution and the frequency of nodes with a particular degree



175 **(Fig. 2e)**. To evaluate the similarity between ground-truth networks and prediction, the Area Under  
176 the Curve (AUC) values were calculated for all the tools (**Supplementary Table S1**) and databases.  
177 Regardless of the classifier used, EPIC-derived PPI networks tend to have higher degree (**Fig. 2e**)  
178 compared to those from complexes in CORUM. This resulted in an AUC of 0.18 for EPIC\_RF, 0.39  
179 for EPIC\_SVM, 0.13 for PCprophet and 0.11 for CORUM, respectively. In this context, an AUC value  
180 closer to the one of reported complexes (CORUM) means a closer resemblance in network topology to  
181 a ground truth network. Finally, we merged all PPI databases (STRING, BioPlex and BioGrid) to  
182 generate a combined network including all deposited interactions and assessed the average distance  
183 between every pair of proteins within a predicted or known complex. The average shortest path for  
184 EPIC\_RF was 2.3 and >3 for EPIC\_SVM while PCprophet-predicted complexes had an average path  
185 of 1.1 edges as shown in **Fig. 2f**, suggesting a greater recovery of closely connected proteins by  
186 PCprophet when compared to the average shortest path in CORUM (1 edge). We also observed a  
187 similar trend on an independent dataset from PrInCE<sup>12</sup> (**Supplementary Fig. S1**). To summarize,  
188 PCprophet allows for robust identification of complexes, as shown based on high recall of known  
189 complexes and high quality of newly predicted complexes, demonstrated based on the high validation  
190 rates of the underlying PPIs by large-scale databases. PCprophet outperforms available tools in the  
191 recovery of known protein complexes and PPIs while additionally providing the opportunity to detect,  
192 investigate and track assemblies that remained inaccessible to computational approaches limited by  
193 their dependence on prior knowledge<sup>10</sup> or the sensitivity of interaction-centric scoring<sup>8, 12, 19</sup>. In order  
194 to control spurious co-elution and false positive assignments, we integrated an error model based on  
195 interactor gene ontology similarity which effectively ensures highest quality of the reported results  
196 (**Supplementary Fig. S2**).

197

## 198 **Predicting PPIs and protein complexes across the mammalian cell cycle via PCprophet**

199 We applied PCprophet to a second, newly published dataset<sup>17</sup> in which HeLa cells were blocked at  
200 mitosis and interphase stages of the cell cycle. Proteins were then extracted under native conditions,



201 SEC separated into 65 fractions and analysed using SWATH-MS. Based on these data, we generated a  
202 large PPI map based on all PCprophet predictions (**Fig. 3a**).

203 PCprophet predicted 858 protein complexes not recorded in the CORUM derived network,  
204 which contain 11527 unique PPIs consistently present across all biological replicates for one condition  
205 (**Fig. 3b**), suggesting good reproducibility across different fractionation experiments. Of these  
206 predicted PPIs, 54.16% are consistently supported by evidence across several PPI databases (STRING,  
207 BioPlex and BioGrid<sup>20</sup>), 14.67% have PPI evidence from a single database while 31.14 % of the PPIs  
208 are completely novel (**Fig. 3c**), consistent with the 30% FDR cut-off used for the search (refer to  
209 ‘**Methods**’ section for more details). FDR in PCprophet is calculated by comparing hits from the  
210 provided database, in this instance CORUM, against positively predicted complexes, thereby 30% of  
211 the PPIs detected cannot be derived from CORUM. We speculated that this set of PPIs without  
212 database evidence would be localized in cellular niches with poorly characterized complexes, such as  
213 membrane bounded organelles<sup>8</sup>. Consistent with this hypothesis, among the top 10 most enriched GO  
214 Cellular Compartments (CC) terms for the novel PPIs, we observed localization enrichment in  
215 mitochondrion, ficolin, cytoskeleton and cytoplasmic-associated lumen (**Fig. 3d**) all with an adjusted  
216 *p*-value of less than 1%.

217 We identified several cases where a novel subunit is assigned to a known complex by PCprophet.  
218 For instance, PCprophet identified a novel protein complex containing the ubiquitin receptor ADRM1  
219 and 26S proteasome (**Fig. 3e**). This association has not been reported in the CORUM database for *homo*  
220 *sapiens* but it has been identified in mammalian cells<sup>21</sup> and is consistent with the crystal structure of *S.*  
221 *cerevisiae* (PDB ID: 6J2C and 6J2Q)<sup>22</sup>. ADRM1 is reported to be a component of the 19S proteasomal  
222 subunit in yeast<sup>22</sup>; accordingly we observed about 15% of the ADRM1 signal to be associated with 19S  
223 (**Fig. 3e**) while the majority was associated with the 26S proteasome, suggesting that ADRM1 is  
224 preassembled in the 19S rather than being later recruited to a fully assembled 26S. We further identified  
225 an interaction between the NEDD8 activating complex NAE1-UBA3 and ASB6 (**Fig. 3f**). The NAE1-  
226 UBA3 complex is required for cell cycle progression by transferring activated NEDD8 to UBE2M and  
227 subsequent proteasomal degradation<sup>23</sup>. ASB6, which belongs to the Ankyrin repeat and SOCS box

228 (ASB) protein family, has been shown to interact with CUL5 and RBX2 to form a non-canonical E3  
229 ubiquitin ligase complex<sup>24</sup>. We observed almost perfect co-elution between the NAE1-UBA3 complex  
230 and ASB6, consistent with reports of ASB6 and UBA3 co-purification in other species<sup>25, 26</sup>, but not  
231 with reported ASB6 binders such as CUL5<sup>24</sup> (**Supplementary Fig. S3**) or reported NAE1-UBA3  
232 binders like UBE2M<sup>16</sup> or TP53BP2<sup>16</sup>. Taken together, the recall of protein-protein interactions absent  
233 from the training set as well as reported complexes, suggests that PCprophet can predict protein  
234 complexes in cellular models that are poorly characterized with respect to protein complexes and PPIs.

235

### 236 **Differential analysis of mitosis-associated protein complexes**

237 We have identified 900 previously reported and 532 novel complexes in HeLa cell lysates derived from  
238 interphase and mitotic cells, with a similar number of complexes in each cellular state (**Fig. 4a**). Due  
239 to the continuous nature of coFrac-MS data it is possible to identify several types of profile differences  
240 at both protein and complex level. First, difference in assembly state causes a shift on the molecular  
241 mass scale, while changes at the abundance level results in an increase peak area for a particular protein.  
242 By similarity, complex compositional changes can be inferred by the difference in peak position of the  
243 subunits or addition of novel proteins, while stoichiometric changes are dependent on ratios between  
244 different proteins. This is a non-trivial issue as metrics based on profile correlation will fail in capturing  
245 abundance difference, while methods based on peak position will not detect variation in peak area. To  
246 overcome this issue, we developed a Bayesian approach to identify altered protein profiles in the  
247 different conditions tested and defined a likelihood for each interaction, which we then combine into a  
248 complex-specific likelihood (see '**Methods**' for more details). This approach has several advantages  
249 over previous methods such as fold change<sup>17</sup> as it does not require a pre-selected threshold and  
250 penalizes proteins with high variability. Overall, we detected 1518 proteins (238 complexes) with a  
251 probability greater than 0.5 of being differentially regulated across the cell cycle (**Fig. 4b**). On this set  
252 of proteins, we performed an enrichment analysis using GO ontology to evaluate if terms associated  
253 with cell cycle and mitosis (**Fig. 4c**) were enriched. Indeed, terms such as M phase, mitosis and nuclear  
254 division are enriched with  $p < 0.001\%$ . Surprisingly, we identified the Prmt5-Wdr77 complex as altered

255 between interphase and mitosis (**Fig 4d**). This complex is composed by a hetero tetramer formed by  
256 Prmt5-Wdr77 dimers in a 1:1 ratio<sup>27</sup> (PDB ID: 4GQB). While this putative 1:1 stoichiometric ratio is  
257 reflected in the protein MS intensities during interphase, upon mitosis it is significantly shifted towards  
258 a 1.75:1 ratio, indicating a gain of Prmt5 copies in the assembly relative to the composition in interphase  
259 (**Fig 4e**). Interestingly, Prmt5<sup>28</sup> and Wdr77<sup>29</sup> have been independently linked to cell cycle regulation  
260 and complex stoichiometry is necessary for correct target methylation by Prmt5<sup>27</sup>. Thus, our data  
261 suggests a potential role for the Prmt5-Wdr77 complex in cell cycle regulation. Furthermore, key events  
262 such as activation of the master mitotic kinase complex CDK1/CCNB1 (**Fig. 4f**), increase in cohesin  
263 complex (**Fig. 4g**) and rewiring of the anaphase promoting complex/cyclosome (**Fig. 4h**) were  
264 successfully captured by our analysis strategy.

265 To conclude, our analysis demonstrates that (i) its ability to recall known complex remodelling  
266 events in cell cycle progression, and (ii) its sensitivity to discriminate between different scenarios such  
267 as increase in abundance (**Fig. 4fg**) and difference in peak shapes (**Fig. 4h**). Altogether, our analysis  
268 recapitulates previous knowledge about cell cycle and cell cycle-related events, selectively recalling  
269 complexes involved in cell cycle progression and mitosis.

270

## 271 **Discussion**

272 Protein complexes play fundamentally important roles in mediating and regulating biological functions.  
273 Recent advances in proteomic technologies based on co-fractionation and mass spectrometric  
274 correlation profiling of protein elution patterns have opened up a promising avenue to characterize  
275 protein complexes at breadth and temporal resolution. State-of-the-art workflows such as SEC-  
276 SWATH-MS techniques and complex-centric data analysis have advanced the selectivity and  
277 throughput of chromatographic protein complex detection but remain limited to the detection of  
278 previously observed protein complexes. Methods to predict novel protein complexes from co-  
279 fractionation data are based on identification of PPIs and inference of complexes from the resulting  
280 weighted network. Such probabilistic methods for network partitioning rely heavily on network  
281 topology, which makes it challenging to partition detected PPIs into complexes, due to the high

282 dimensionality of the data. In light of this, we introduced the PCprophet framework which combines  
283 complex-level scoring with powerful machine learning technology to classify and confidently predict  
284 novel protein complexes from protein coFrac-MS data. In addition, PCprophet facilitates the  
285 differential tracking and comparison of these complexes across two or more experimental conditions  
286 that become increasingly accessible via high throughput implementations of coFrac-MS. We have  
287 demonstrated outstanding prediction performance of PCprophet on manually annotated datasets and  
288 have shown that the method significantly outperforms state-of-the-art complex prediction and  
289 identification tools. We have developed a Bayesian inference-based method to analyse differences in  
290 protein complex abundance and composition across conditions. Our analysis on proteomic profiles  
291 across the cell cycle of HeLa cells demonstrated that PCprophet can capture expected changes in  
292 protein complexes between interphase and mitotic cells.

293 PCprophet is available in command-line version under MIT licence  
294 (<https://github.com/fossatiA/PCprophet>) and is easily applied to any coFrac-MS dataset. The data pre-  
295 processing module readily accepts different types of quantitative protein level tables. PCprophet could  
296 also be applied in clinical proteomics and personalized medicine areas, to assist the discovery and  
297 analysis of novel protein complexes and to identify complexes that are altered across groups of samples.  
298 We anticipate that the PCprophet package will serve as a reliable and accurate tool for novel protein  
299 complex prediction and analysis from co-fractionation MS data because it extends the scope of  
300 comparative proteomics from the level of differentially abundant proteins to the level of differentially  
301 abundant and perturbed complexes between samples, thus bringing proteomic analysis closer to  
302 biological function.

303

## 304 **Methods**

305 Methods, including statements of data availability and any source code and references, are available in  
306 the online version of the paper.

307

308

## 309 **Acknowledgements**

310 This work was supported in part by the Swiss National Science Foundation (grant No. 3100A0-688  
311 107679 to R.A.) and the European Research Council (ERC-2014AdG 670821 to R.A.). C.L. is  
312 currently supported by a National Health and Medicine Research Council (NHMRC) of Australia CJ  
313 Martin Early Career Research Fellowship (1143366). M.G. and F.F. acknowledge the support by the  
314 Innovative Medicines Initiative project ULTRA-DD (FP07/2007-2013, grant No. 115766). I.B.  
315 acknowledges funding support from the Swiss National Science Foundation (31003A\_166435). AWP  
316 is supported by a NHMRC Principal Research Fellowship (1137739). The authors would like to thank  
317 Dr. Natalie de Souza from ETH Zurich and Associate Professor Jiangning Song from Monash  
318 University for their critical comments on this study.

319

## 320 **Author contributions**

321 R.A., A.F., C.L. and M.G. conceived and designed the project. A.F. and C.L. designed, developed and  
322 implemented PCprophet, and conducted data analysis, machine-learning prediction and benchmarking  
323 experiments with other existing methods. P.S. designed and implemented the differential analysis  
324 module for protein complexes. M. Heusel, F.F. and F.U. contributed to data annotation and provided  
325 critical feedback and comments on the biological aspects. M. Hallal contributed to EPIC performance  
326 comparison and reproducibility test for PCprophet performance. I.B. assisted with benchmarking  
327 experiments with CCprofiler and provided useful insights. C.T.K., P.X. and A.W.P. provided critical  
328 and insightful comments during the development of PCprophet. C.L., A.F., M.G. and R.A. drafted the  
329 manuscript, which has been revised and approved by all the other authors.

330

## 331 **Competing financial interests**

332 The authors declare no competing financial interest.

## 333 **Methods**

### 334 **Training dataset curation and annotation**

335 In total, three co-fractionation replicates using SWATH and DDA-SILAC based datasets were used to  
336 train and evaluate PCprophet, including the SEC-SWATH-MS dataset from HEK293 cell line<sup>10</sup> for  
337 training PCprophet, the mitotic proteomic data from HeLa CCL2 cells<sup>17</sup> and the DDA-SILAC dataset  
338 extracted from the study by Kristensen and used as testing dataset for PrInCE<sup>12</sup>, for independently  
339 testing PCprophet. Note that we did not use the *C. elegans* protein complex dataset from the EPIC<sup>8</sup>  
340 package to test PCprophet for the following reasons: (i) their datasets used spectral count; however our  
341 previous study showed lower performance of spectral counts compared to XIC based quantitation (MS1  
342 or MS2) for complex analysis<sup>10</sup>; (ii) the features and pre-processing employed in PCprophet are  
343 inherently continuous in nature such as correlation and FWHM; and (iii) EPIC was developed and  
344 evaluated using the same dataset. It is therefore challenging to conduct an unbiased and fair estimation  
345 and comparison of the performance for all the other approaches. A structuralized description of these  
346 datasets is available in **Supplementary Table S2**.

347 To train accurate machine-learning models, we manually annotated the protein complexes from  
348 the SEC-SWATH-MS dataset from HEK293 cells<sup>10</sup>. Briefly, samples were acquired in SWATH mode  
349 using a sample-specific library generated from high-pH fractionated samples. Following conversion to  
350 mzXML via msConvert, OpenSWATH search was performed with the parameter previously  
351 described<sup>10</sup>. As a result, the final feature alignment outputs from TRIC<sup>30</sup> (using top2 protein  
352 quantification) was used for the training PCprophet. The reference core (non-redundant) complexes  
353 were downloaded from CORUM v3.0<sup>13</sup>. Protein accession numbers were converted into gene names  
354 and sequentially mapped to CORUM. We removed complexes from our dataset where the number of  
355 subunits present in the dataset was less than 50% of known components to retain only complexes with  
356 high coverage, consistent with the annotation strategy for the complex analysis software CCprofiler<sup>10</sup>.  
357 To train a supervised classification model, it is crucial to reliably annotate the samples of positive (i.e.  
358 complexes with good co-elution profiles) and negative (i.e. complexes with poor co-elution profiles)  
359 classes. For the training dataset (i.e. HEK293), a protein complex was annotated positive if it satisfied

360 the following criteria. First, more than 75% of the known subunits coeluted in the same fraction with  
361 baseline resolution; second, the main peak was required to have a minimal FWHM (full width at half  
362 maximum) of 4 fraction; third, minimal normalized height of 20% to the maximum signal for every  
363 protein and needs to be at least 10% above background, and the complex has been annotated in the  
364 CORUM database. On the other hand, if the complex was annotated in CORUM but did not pass all  
365 the other criteria it was annotated as negative. To objectively annotate the protein complexes in the  
366 training dataset, three annotators were involved in this procedure and only positive and negative protein  
367 complexes nominated and agreed by all the annotators were used. Notice that we did not randomly  
368 select proteins to form negative but ‘fake’ protein complexes, as there would be a huge number of  
369 different combinations and possibilities and might result in random selection of undiscovered protein-  
370 protein interaction. In addition, we changed the original number of fractions of the training dataset from  
371 81 to 72, to standardize number of fractions across different experiments. The final resulting training  
372 dataset contained 242 positive protein complexes and 738 negative complexes.

373

### 374 **Dataset pre-processing**

375 Prior to the generation of potential protein complexes based on the protein raw matrices across various  
376 conditions, four data pre-processing steps are performed, including Gaussian filtering, missing value  
377 imputation, linear interpolation, and data rescaling. One-dimension Gaussian filtering,

$$G(x) = \frac{1}{\sqrt{2\pi}\sigma} e^{-\frac{x^2}{2\sigma^2}} \quad (1)$$

378  
379 was employed to smooth the data by removing noise and approximating peaks as Gaussian curves,  
380 where  $x$  denotes the intensity of the current fraction and  $\sigma$  was set to 1. To remove the missing values  
381 in the raw data, an imputation strategy by calculating the average of the two neighbours of missing  
382 value, was implemented. The number of fractions  $N$  in the co-fractionation experiments always varies  
383 due to various experimental setups and inherent variability. When constructing the machine-learning  
384 models, the number of features is dependent on the number of fractions (see ‘Feature engineering and  
385 construction of machine-learning models’ for feature generation). Based on the number of fractions



386 (i.e. 72) in our training dataset (see ‘Data curation and annotation’ for details), it was therefore  
387 necessary to rescale the number of fractions of user-provided datasets to 72. In PCprophet, resampling  
388 and one-dimensional linear interpolation were applied for this purpose, thereby rescaling the number  
389 of fractions to 72, consistent with the training dataset. Lastly, we added an additional step to standardize  
390 every protein profile from their original intensity in the range [0, 1] to make it independent from the  
391 quantitation strategy used.

392

### 393 **Hypothesis generation**

394 In this study, hypothesis generation refers to the construction of putative protein complexes.  
395 Theoretically, there could be a huge number of possible combinations of proteins to form different  
396 protein complexes. Rather, we proposed a hypothesis generation module to construct potential protein  
397 complexes by aligning peaks of different proteins and cutting the dendrogram-like tree structure,  
398 similar to the procedure discussed in a previous study<sup>11</sup>. To do so, hypothesis generation firstly  
399 performs peak-picking to identify all the apexes of intensity and their associated fractions of all proteins  
400 in the input data, with the help of the Python package ‘SciPy’ (<https://www.scipy.org/>). Then linkage  
401 hierarchical clustering using the ‘Ward’ distance measure was performed based on the apexes collected  
402 during the peak-picking stage. A dendrogram-like tree structure was then generated based on the results  
403 of the linkage hierarchical clustering. The hypotheses (i.e. putative protein complexes) were then  
404 generated by cutting the dendrogram from bottom to top at each level. A conceptual illustration of the  
405 hypothesis generation is presented in **Supplementary Fig. S4**. In practice, these steps are performed  
406 on a linkage matrix instead of a dendrogram structure to further reduce the computational burden.

407

### 408 **Feature engineering and construction of machine-learning models.**

409 To represent a protein complex, we designed a variety of features based on the protein co-elution profile  
410 and the number of fractions  $N$ . These features are mainly categorised in four groups: (1) average  
411 intensity difference of proteins within each fraction (**Supplementary Fig. S5a**), (2) local correlation

412 of proteins at each window (**Supplementary Fig. S5b**), (3) shift of apex fraction of each protein  
413 (**Supplementary Fig. S5c**), and (4) average full width half maximum (**Supplementary Fig. S5d**).

414 For the intensity difference of proteins and the correlation of proteins at each fraction, we set a  
415 sliding window (6 fractions wide) with 1 fraction step wise increase. The intensity difference of proteins,  
416  $D_{intensity\_i}$  reflects the average difference of intensity values of protein  $a$ ,  $b$ , and  $c$ , at each fraction,  
417 calculated by:

$$D_{intensity\_i} = \mu(|a_i - b_i|, |a_i - c_i|, |b_i - c_i|), i = (1, 2, \dots, N) \quad (2)$$

418 where  $i$  denotes the number of fractions. As a result, the dimension of this feature type is  $N$ . Similarly,  
419 at each window, pairwise correlation of intensity was also calculated, using:

$$Corr_i = \mu(Corr(a_{wi}, b_{wi}), Corr(a_{wi}, c_{wi}), Corr(b_{wi}, c_{wi})), i = (1, 2, \dots, N) \quad (3)$$

421 Where  $a_{wi}$  denotes the local value of  $a$  in a window  $w$  centred at fraction  $i$ . For the other two types of  
422 features, including fraction difference of apex peaks and full width half maximum a two step-procedure  
423 is employed. First, all peaks for a protein complex hypothesis are selected, and then a modified version  
424 of the Dijkstra's algorithm is applied to select the peaks for every protein with the minimum distance.  
425 By selecting the closer peaks, we are able to positively predict proteins with multiple peaks in separate  
426 assemblies, as we avoid the use of heuristic to select the complex-specific peak. While the apex  
427 difference is a feature used also in the PrInCE software<sup>12</sup>, substantial differences are present as in this  
428 tool, the fraction with the maximum value for every protein is counted as apex, thereby using always  
429 the same peak for a protein in multiple assemblies.

431 For the average apex difference, we used following formula for the calculation, respectively:

$$F_{a,b,c} = \mu(|X_{pa} - X_{pb}|, |X_{pa} - X_{pc}|, |X_{pb} - X_{pc}|), \quad (4)$$

432 where  $X_{pa}$ ,  $X_{pb}$ ,  $X_{pc}$  represent the apex fraction of protein  $a$ ,  $b$  and  $c$ , respectively. The average full  
433 width half maximum is calculated using:

$$FWHM_{a,b,c} = \mu(|X_{a\_right} - X_{a\_left}|, |X_{b\_right} - X_{b\_left}|, |X_{c\_right} - X_{c\_left}|), \quad (5)$$

435

436 while  $X_{a\_right}$ -  $X_{a\_left}$ ,  $X_{b\_right}$ ,  $X_{b\_left}$ ,  $X_{c\_right}$ ,  $X_{c\_left}$  demonstrate the width when achieving half  
437 intensity area of the co-elution curve of protein  $a$ ,  $b$  and  $c$ , respectively. In total, we generated  $2N + 2$   
438 features (i.e., 146 when  $N=72$ ).

439 Five well-established machine-learning models were selected to test the prediction performance,  
440 including Decision Tree (J48)<sup>31</sup>, Random Forest<sup>32</sup> (RF), Naïve Bayes<sup>33</sup> (NB), Support Vector  
441 Machines<sup>34</sup> (SVM) and Logistic Regression<sup>35</sup> (LR). For SVM, we selected two major kernels, including  
442 polynomial and RBF<sup>36</sup> (Radial Basis Function) kernels, due to the consideration of the balance of  
443 computational complexity and running time. These two models were then termed as SVM\_POLY and  
444 SVM\_RBF, respectively. Note that the above machine-learning algorithms were implemented using  
445 the scikit-learn package<sup>37</sup> and cross-tested in the WEKA<sup>38</sup> platform. Different implementations of such  
446 algorithms in other platforms may cause difference in term of prediction performance. To objectively  
447 portrait the prediction performance and avoid overfitting, five-fold cross-validation strategy using the  
448 training dataset was performed, together with five widely acknowledged performance measures,  
449 including accuracy (ACC), area under the curve (AUC), Matthew's correlation coefficient (MCC),  
450 sensitivity and specificity:

$$Acc = \frac{TP + TN}{TP + TN + FP + FN} \quad (6)$$

$$MCC = \frac{TP \times TN - FP \times FN}{\sqrt{(TP + FP)(TP + FN)(TN + FP)(TN + FN)}} \quad (7)$$

$$Sensitivity = \frac{TP}{TP + FN} \quad (8)$$

$$Specificity/TPR = \frac{TN}{TN + FP} \quad (9)$$

455 where  $TP$ ,  $TN$ ,  $FP$ ,  $FN$  are true positives, true negatives, false positives and false negatives, respectively.

456

457

458

## 459 **Benchmarking with state-of-the-art approaches for co-fractionation MS based protein complex** 460 **prediction**

461 We compared the prediction performance of PCprophet with currently existing computational  
462 approaches for protein complex characterization based on co-fractionation MS data, including  
463 CCprofiler<sup>10</sup>, EPIC<sup>8</sup>, and PrInCE<sup>12</sup>. CCprofiler is a statistical approach for the identification of protein  
464 complexes by referencing databases as prior information. In contrast, EPIC and PrInCE were designed  
465 to infer protein complexes based on PPI prediction from co-elution profiles. When running EPIC, two  
466 provided models, including SVM and RF (i.e. -M RF and -M SVM) were both tested with other  
467 parameters by default (i.e. -t 9606 for *H. sapiens*; -s 11101001; -f STRING). Two datasets, as shown  
468 in **Supplementary Table S2** were used to benchmark with CCprofiler and EPIC, including the mitotic  
469 proteomic data from HeLa cells<sup>17</sup>, and the soluble protein complex dataset from the study of Stacey *et*  
470 *al.*<sup>12</sup>

471 *Benchmarking using HeLa mitotic proteomic data.* The TRIC feature aligned file of the dataset  
472 was imported into CCprofiler and following sibling peptide correlation (the ‘filterBySibPepCorr’  
473 function). Protein quantification was done using the top 2 proteotypic peptides per protein. The  
474 resulting protein tables were exported and used as input for EPIC and PCprophet. PCprophet was run  
475 with default parameters, with the FDR fixed at 30% and controlled using the CORUM database.  
476 CCprofiler complex-centric analysis was done as previously described<sup>1</sup>, using `smoothing_length = 9`,  
477 `corr_cutoff = 0.95`, `window_size = 8`, `rt_height = 3` and a 2x molecular weight cutoff<sup>1</sup>. For the  
478 calculation of recall against CORUM, PCprophet output (i.e. the ‘ComplexReport.txt’ file) was filtered  
479 to only ‘Reported’ complexes which were predicted as ‘Positive’; while EPIC derived complexes were  
480 matched to CORUM by defining a positive predicted complex in which 50% or more subunits are  
481 reported in a single CORUM core complex. For CCprofiler, the positive complexes were defined when  
482 the q-value is smaller than 5%, as previously described<sup>1</sup>. The number of complexes was considered  
483 across replicates as the number of unique positive CORUM Complex ID. Two measures were applied  
484 when assessing the prediction performance, including True Positive Rate (TPR; specificity) and  
485 Positive Predicted Value (PPV), which is defined as follows:

$$PPV = \frac{TP}{(TP + FP)} \quad (10)$$

486  
487 For evaluation of average network degree, protein complexes from the prediction outputs of EPIC and  
488 PCprophet, and CORUM (Human only) were collapsed to a PPI network. The reference networks from  
489 STRING (Human) and BioPlex were downloaded and used directly. Degree calculation for every  
490 protein in the networks was done using the NetworkX package v2.1 (<https://networkx.github.io>) and  
491 ranked. A log-log plot was generated and the AUC for the resulting curve was calculated using the  
492 integrate module from SciPy (<https://www.scipy.org>). For evaluation of node centrality, the resulting  
493 complexes from PCprophet, EPIC\_RF and EPIC\_SVM were projected into a subgraph generated by  
494 filtering STRING to only nodes present in the original protein matrixes thereby representing all the  
495 reported protein-protein interaction available in our data. For every complex in the three tools  
496 (PCprophet, EPIC\_RF and EPIC\_SVM) the average complex closeness (ACC) was defined as the  
497 mean shortest path between all members. The resulting vector represents the tendency of the different  
498 algorithms to recapitulate first, second or outer shells level of interactors. The same was done also for  
499 CORUM complexes within the same subgraph. Average complex size was defined as the mean number  
500 of subunits for the same complex across replicate for PCprophet and the number of subunits for every  
501 complex in the EPIC output.

502 *Benchmarking using the DDA-SILAC dataset*<sup>18</sup>. Condition1.tsv and condition2.tsv were  
503 downloaded from <https://github.com/fosterlab/PrInCE-Matlab> and separated into the different  
504 replicates. PCprophet and EPIC were run as described above. TPR and PPV were calculated as  
505 described above for CORUM. For BioPlex and STRING both networks were filtered to remove  
506 proteins not identified. PCprophet, EPIC\_RF and EPIC\_SVM derived complexes were collapsed to  
507 generate a PPIs network and then recall was calculated using a PPI-centric approach by assessing which  
508 fraction of PPIs was present over the entire reference (TPR) and which fractions of PPIs was correct  
509 across all of the predicted one (PPV). Centrality assessment via KS test and AUC calculation was done  
510 as described above.

511

512

### 513 **Post-prediction processing**

514 During this stage, GO (Gene Ontology) term score filtering and complex combination and collapsing  
515 are performed in order to ensure the reliability of predicted complexes. Despite the incompleteness of  
516 GO term annotation of CORUM database, we compared the distributions of GO terms of predicted  
517 protein complexes and documented protein complexes in the CORUM database<sup>13</sup> (**Supplementary Fig.**  
518 **S6a**). We first collected GO terms of each protein in a predicted complex based on the annotation of  
519 AmiGO2 database (i.e. the Gene Ontology resource)<sup>39-41</sup>. Then, for every possible protein pair we  
520 calculated pairwise GO term semantic similarity using the strategy published by Wang *et al*<sup>42</sup>. For  
521 instance, given a protein complex  $PC$  with three subunits  $A$ ,  $B$  and  $C$ , all the GO terms, including  
522 molecular function (MF), biological process (BP), and cellular component (CC) are collected. For all  
523 the three possible protein pairs, including  $A$ - $B$ ,  $A$ - $C$  and  $B$ - $C$ , within each category, the semantic  
524 similarity scores of all the pairwise GO terms are calculated and the average score is reported as the  
525 overall score for the current GO category. The final overall GO score of protein complex  $PC$  in this  
526 case is then defined as follows:

$$GO(PC) = \mu(MF(A, B), MF(A, C), MF(B, C)) + \mu(BP(A, B), BP(A, C), BP(B, C)) \\ + \mu(CC(A, B), CC(A, C), CC(B, C)). \quad (11)$$

527

528 The GO term scores of core protein complexes from the CORUM database are calculated using the  
529 same strategy. Given the two distributions of the GO term scores of both protein complex hypothesis  
530 and the complexes harboured from the CORUM database, we then estimated false discovery rate for  
531 the positively predicted hypothesis by calculating global FDR for every GO scores of positive CORUM  
532 complexes with the following formula:

$$FDR_{(s|GO_h, GO_c)} = \frac{\int_s^\infty GO_h(x) dx}{\int_t^\infty GO_c(x) dx}, \quad (12)$$

533

534 where  $GO_h$  and  $GO_c$  are defined as distributions of the Wang similarity score for hypothesis (h) and  
535 CORUM-derived complexes (c). This allows us to obtain the specific GO term score that satisfies the

536 target FDR for filtering the predicted protein complexes without having to use a fixed threshold, thereby  
537 allowing for more or less conservative searches.

538         Given the possibility that the positive complex hypothesis might be a subset of a bigger complex  
539 or might contain multiple smaller complexes, PCprophet allows users to select a complex collapsing  
540 mode to further process the predicted complexes (**Supplementary Fig. S6b**), including ‘GO’ (based  
541 on GO terms), ‘CAL’ (based on the provided calibration curve), ‘SUPER’ (to find the biggest protein  
542 complex), and ‘NONE’ (to ignore this process). Specifically, following prediction and FDR control,  
543 overlap is calculated and complexes for which the overlap is more than 0.75 are merged on the different  
544 criterion. Given a set of complexes defined as follows in **Supplementary Table S3**, for example,  
545 collapsing using ‘GO’ will result in the complex which has the greatest GO score (i.e. **PC2**). The  
546 ‘SUPER’ option will select the of the complex with the highest number of subunits (i.e. **PC3**) while  
547 choosing ‘CAL’ will calculate the difference between apparent MW from the SEC and extrapolated  
548 molecular weight from the calibration curve. The complex with the smaller difference (i.e. **PC3**) will  
549 therefore be selected. The ‘CAL’ mode is selectable only if the calibration and a molecular weight  
550 table from the UniProt<sup>43</sup> database or similar format is provided. ‘NONE’ option will skip the collapsing  
551 procedure.

552

### 553 **Protein complex differential analysis across different conditions**

554 *Bayesian inference of differential regulation of protein abundance.* Inferring differentially regulated  
555 proteins assumes that protein abundance measurements were obtained for a number of samples which  
556 differ in a biological phenotype of interest. This situation allows representing the protein abundance  
557 measurements for one protein as a matrix  $X$  where rows correspond to samples and columns correspond  
558 to retention time. Phenotype information  $t$  is assumed to be discrete with cardinality  $\#t$  and order  
559 matched such that the phenotype information for sample  $n$ ,  $t_n = t[n]$  corresponds to the protein  
560 abundance row vector  $x_n = X[n]$ . If we assume that the correct model is among the investigated  
561 candidate models, we have a problem termed ‘m-closed model selection’<sup>44</sup>. In this situation the  
562 Bayesian approach to inferring whether a phenotype change corresponds to differential regulation in



563 protein abundance suggests to use marginal likelihoods to derive the corresponding Bayes factors<sup>44</sup>. To  
 564 obtain a solution which may be calculated analytically, we use the model illustrated in **Supplementary**  
 565 **Fig. S7a**. The model represents protein abundance measurements by Normal-Whishart distributions.  
 566 Differential regulation is implicitly represented (variable not shown in the graph) via a protein specific  
 567 indicator variable  $I_p$ . Differential regulation is coded by  $I_p = 1$  and results in modelling the protein  
 568 abundances  $x_n$  conditionally on phenotype states  $t_n$  by phenotype specific Gaussian distributions. To  
 569 obtain a measure of differential protein regulation we compare the  $I_p = 1$  model with a simpler  
 570 explanation which we denote as  $I_p = 0$ . The simple model corresponds to a non-differential regulation  
 571 assumption and uses one common Gaussian distribution to model  $x_n$  irrespective of the phenotype state  
 572  $t_n$ . Irrespective whether we have  $\#t$  multivariate Gaussians in case of  $I_p = 1$  or one shared Gaussian  
 573 in case of  $I_p = 0$ , the joint distribution of data and model parameters  $P(\mathbf{X}, \mu, \Lambda | \mathbf{t}, \gamma, m, g, h)$  is  
 574 represented by the directed acyclic graph (DAG) in **Supplementary Fig. S7a**. In case of  $I_p = 1$  we  
 575 have

$$p(\mathbf{X}, \mu, \Lambda | \mathbf{t}, \gamma, m, g, h, I_p = 1) = p(\Lambda | g, h) \prod_{\tau=1}^{\#t} p(\mu_{\tau} | m, \gamma, \Lambda) \prod_n p(x_n | \mu_{t_n}, \Lambda), \quad (13)$$

576 whereas in case of  $I_p = 0$  we have the simpler relation

$$p(\mathbf{X}, \mu, \Lambda | \mathbf{t}, \gamma, m, g, h, I_p = 0) = p(\Lambda | g, h) p(\mu | m, \gamma, \Lambda) \prod_n p(x_n | \mu, \Lambda). \quad (14)$$

577 The next step to obtain a measure of differential regulation is to calculate the marginal likelihood for  
 578 both models in Equation (13) and Equation (14). For Equation (13) we get

$$p(\mathbf{X} | \mathbf{t}, \gamma, m, g, h, I_p = 1) = \int_{\Lambda} \int_{\mu_{\tau} \forall \tau} \left( p(\Lambda | g, h) \prod_{\tau=1}^{\#t} p(\mu_{\tau} | m, \gamma, \Lambda) \prod_n p(x_n | \mu_{t_n}, \Lambda) d\Lambda \prod_{\tau=1}^{\#t} d\mu_{\tau} \right), \quad (15)$$

579 while Equation (14) leads to

$$p(\mathbf{X} | \mathbf{t}, \gamma, m, g, h, I_p = 0) = \int_{\mu} \int_{\Lambda} p(\Lambda | g, h) p(\mu | m, \gamma, \Lambda) \prod_n p(x_n | \mu, \Lambda) d\mu, d\Lambda. \quad (16)$$

580 For coding equal preference for the indicator values  $I_p = 1$  and  $I_p = 0$  we use a flat prior and hence

581  $P(I_p = 1) = P(I_p = 0) = 0.5$ . The marginal likelihoods in Equations (15) and (16) can subsequently

582 be converted to the posterior probability for differential regulation of protein abundance

583  $P(I_p \equiv 1 | \mathbf{t}, \gamma, m, g, h)$ :

$$P(I_p = 1 | \mathbf{t}, \gamma, m, g, h) = \frac{p(\mathbf{X} | \mathbf{t}, \gamma, m, g, h, I_p = 1)}{p(\mathbf{X} | \mathbf{t}, \gamma, m, g, h, I_p = 1) + p(\mathbf{X} | \mathbf{t}, \gamma, m, g, h, I_p = 0)} \quad (17)$$

584  
 585 Taking the posterior probability  $P(I_p = 1 | \mathbf{t}, \gamma, m, g, h)$  in Equation (17) as measure of differential  
 586 protein regulation is justified by the fact that Bayesian model selection has Occam's razor built in<sup>44</sup>.  
 587 Posterior probability values  $P(I_p = 1 | \mathbf{t}, \gamma, m, g, h)$  which are larger than 0.5 will only be observed if  
 588 the more complex model ( $I_p = 1$ ) provides a substantially better fit of the data  $\mathbf{X}$  and  $\mathbf{t}$  than the simpler  
 589 model ( $I_p = 0$ ).

590 *Inferring differentially regulated protein complexes.* Inference of differential regulation of  
 591 protein complexes assumes that the assignment of proteins to protein complexes is known. All  
 592 subsequent derivations assume thus that the protein complex  $c$  is defined as a set of proteins  $C_c =$   
 593  $[P_1, P_2, \dots, P_C]$  of cardinality  $C$ . We assume furthermore that a set of retention profiles  $X_c =$   
 594  $[X_{P_1}, X_{P_2}, \dots, X_{P_C}]$  and a corresponding set of phenotype descriptions  $t_c = [t_{P_1}, t_{P_2}, \dots, t_{P_C}]$  is available.  
 595 If the retention profiles in  $X_c$  and thus the corresponding phenotype characteristics in  $t_c$  can at least in  
 596 part be paired among all proteins which establish a complex, we have the subset  $N_c = [n_1, n_2, \dots, n_K]$   
 597 of samples for which complete observations are available. To prepare inferring differentially regulated  
 598 protein complexes we may in this situation aggregate the protein specific retention profiles to a column  
 599 concatenated matrix  $\mathbf{Y}_c$  which represents all retention profiles of the entire complex. Denoting the  
 600 selection of the  $n^{\text{th}}$  row of matrix  $X_{P_c}$  as  $X_{P_c}[n]$  and column wise row concatenation of row vectors  
 601  $X_{P_c}[n]$  and  $X_{P_{c+1}}[n]$  as  $[X_{P_c}[n], [X_{P_{c+1}}[n]]$ , we obtain

$$\mathbf{Y}_c = \begin{pmatrix} X_{P_1}[n_1], & X_{P_2}[n_1], & \dots, & X_{P_C}[n_1] \\ X_{P_1}[n_2], & X_{P_2}[n_2], & \dots, & X_{P_C}[n_2] \\ \vdots & \dots & \dots & \vdots \\ X_{P_1}[n_K], & X_{P_2}[n_K], & \dots, & X_{P_C}[n_K] \end{pmatrix},$$

603 as protein complex specific matrix of retention profiles and  $\mathbf{u}_c = [t_{P_1}[n_1], t_{P_1}[n_2], \dots, t_{P_1}[n_K]]^T$  as  
 604 protein complex specific phenotype vector. Inference of differentially regulated complexes is now a  
 605 straightforward application of Equation (15), Equation (16) and Equation (17). We have just got to  
 606 replace the protein specific retention profiles  $\mathbf{X}$  in these equations with the protein complex specific

607 retention profiles  $Y_c$  and exchange the phenotype characterization  $t$  with the phenotype  
608 characterization of the protein complex  $u_c$ . Pooling of retention profiles requires in addition to the  
609 assumptions which led to the DAG in Figure 1 no additional assumptions. While this is an advantage  
610 of the approach, we have to consider that pooling of samples requires complete sets of paired retention  
611 profiles which have to be available for all proteins which aggregate to the complex. In practice  
612 measurement errors will lead to random dropouts and thus to a potentially small number of samples  
613 where all data is available. To avoid such information loss by pairing of samples, we propose an  
614 additional approach for assessing differentially regulated protein complexes by Bayesian model  
615 probabilities. For assessing differential regulation of protein complex  $c$  we apply Equations (15), (16)  
616 and (17) for every protein  $P_k \in C_c$  separately. Following the assessment on protein level, differential  
617 expression of protein complex  $c$  is coded via a binary indicator variable  $C_c$ . Assuming conditional  
618 independence among proteins we may represent this proposition by the DAG in **Supplementary Fig.**  
619 **S7b**. The DAG leads for the posterior probability of differential regulation of protein complex  $C_c$   
620 finally to Equation (18).

621

$$P(C_c \equiv 1 | \mathbf{X}_{P_1}, \dots, \mathbf{X}_{P_C}, \mathbf{t}_{P_1}, \dots, \mathbf{t}_{P_C}, \gamma, m, g, h) = \frac{P(C_c \equiv 1) \prod_{P_k \in C_c} p(\mathbf{X}_{P_k} | \mathbf{t}_{P_k}, \gamma, m, g, h, I_{P_k} \equiv 1)}{\sum_{I=0}^1 P(C_c \equiv I) \prod_{P_k \in C_c} p(\mathbf{X}_{P_k} | \mathbf{t}_{P_k}, \gamma, m, g, h, I_{P_k} \equiv I)}, \quad (18)$$

622

623 with  $P_k \in C_c$  denoting all proteins which aggregate to the protein complex  $c$ . The prior probability for  
624 protein complex  $c$  being differentially regulated,  $P(C_c)$ , is assumed to be identical for both indicator  
625 values and thus  $P(C_c = 1) = P(C_c = 0) = 0.5$ . The expression  $p(\mathbf{X}_{P_k} | \mathbf{t}_{P_k}, \gamma, m, g, h, I_{P_k} = [0,1])$  denotes  
626 for  $I = [0, 1]$  the marginal likelihoods we obtain with the model in **Supplementary Fig. S7a** for  
627 protein  $P_k$  according to Supplementary Equations (15) and (16).

628

## 629 **Software implementation and data visualisation**

630 The command-line version of PCprophet was implemented and visualised using Python, together with  
631 third-party packages including SciPy, Pandas<sup>45</sup>, scikit-learn<sup>37</sup>, NetworkX<sup>46</sup>, and Matplotlib<sup>47</sup>.

632

### 633 Source code availability

634 PCprophet is open-access and freely available for academic purposes at

635 <https://github.com/fossatiA/PCprophet> under the MIT License.

636

### 637 References

- 638 1. Marsh, J.A. & Teichmann, S.A. Structure, dynamics, assembly, and evolution of protein  
639 complexes. *Annu Rev Biochem* **84**, 551-575 (2015).
- 640 2. Pan, J. et al. Interrogation of Mammalian Protein Complex Structure, Function, and  
641 Membership Using Genome-Scale Fitness Screens. *Cell Syst* **6**, 555-568 e557 (2018).
- 642 3. Sowmya, G., Breen, E.J. & Ranganathan, S. Linking structural features of protein complexes  
643 and biological function. *Protein Sci* **24**, 1486-1494 (2015).
- 644 4. Spirin, V. & Mirny, L.A. Protein complexes and functional modules in molecular networks.  
645 *Proc Natl Acad Sci U S A* **100**, 12123-12128 (2003).
- 646 5. Salas, D., Stacey, R.G., Akinlaja, M. & Foster, L.J. Next-generation Interactomics:  
647 Considerations for the Use of Co-elution to Measure Protein Interaction Networks. *Mol Cell*  
648 *Proteomics* **19**, 1-10 (2020).
- 649 6. Scott, N.E. et al. Interactome disassembly during apoptosis occurs independent of caspase  
650 cleavage. *Mol Syst Biol* **13**, 906 (2017).
- 651 7. Crozier, T.W.M., Tinti, M., Larance, M., Lamond, A.I. & Ferguson, M.A.J. Prediction of  
652 Protein Complexes in *Trypanosoma brucei* by Protein Correlation Profiling Mass Spectrometry  
653 and Machine Learning. *Mol Cell Proteomics* **16**, 2254-2267 (2017).
- 654 8. Hu, L.Z. et al. EPIC: software toolkit for elution profile-based inference of protein complexes.  
655 *Nat Methods* **16**, 737-742 (2019).
- 656 9. Kirkwood, K.J., Ahmad, Y., Larance, M. & Lamond, A.I. Characterization of native protein  
657 complexes and protein isoform variation using size-fractionation-based quantitative proteomics.  
658 *Mol Cell Proteomics* **12**, 3851-3873 (2013).
- 659 10. Heusel, M. et al. Complex-centric proteome profiling by SEC-SWATH-MS. *Mol Syst Biol* **15**,  
660 e8438 (2019).
- 661 11. McBride, Z. et al. A Label-free Mass Spectrometry Method to Predict Endogenous Protein  
662 Complex Composition. *Mol Cell Proteomics* **18**, 1588-1606 (2019).
- 663 12. Stacey, R.G., Skinnider, M.A., Scott, N.E. & Foster, L.J. A rapid and accurate approach for  
664 prediction of interactomes from co-elution data (PrInCE). *BMC Bioinformatics* **18**, 457 (2017).
- 665 13. Giurgiu, M. et al. CORUM: the comprehensive resource of mammalian protein complexes-  
666 2019. *Nucleic Acids Res* **47**, D559-D563 (2019).
- 667 14. Szklarczyk, D. et al. STRING v11: protein-protein association networks with increased  
668 coverage, supporting functional discovery in genome-wide experimental datasets. *Nucleic*  
669 *Acids Res* **47**, D607-D613 (2019).
- 670 15. Huttlin, E.L. et al. Architecture of the human interactome defines protein communities and  
671 disease networks. *Nature* **545**, 505-509 (2017).
- 672 16. Huttlin, E.L. et al. The BioPlex Network: A Systematic Exploration of the Human Interactome.  
673 *Cell* **162**, 425-440 (2015).
- 674 17. Heusel, M. et al. A global screen for assembly state changes of the mitotic proteome by SEC-  
675 SWATH-MS. *Cell Syst* (2019).
- 676 18. Kristensen, A.R., Gsponer, J. & Foster, L.J. A high-throughput approach for measuring  
677 temporal changes in the interactome. *Nat Methods* **9**, 907-909 (2012).
- 678 19. Havugimana, P.C. et al. A census of human soluble protein complexes. *Cell* **150**, 1068-1081  
679 (2012).

- 680 20. Oughtred, R. et al. The BioGRID interaction database: 2019 update. *Nucleic Acids Res* **47**,  
681 D529-D541 (2019).
- 682 21. Hamazaki, J. et al. A novel proteasome interacting protein recruits the deubiquitinating enzyme  
683 UCH37 to 26S proteasomes. *EMBO J* **25**, 4524-4536 (2006).
- 684 22. Lasker, K. et al. Molecular architecture of the 26S proteasome holocomplex determined by an  
685 integrative approach. *Proc Natl Acad Sci U S A* **109**, 1380-1387 (2012).
- 686 23. Huang, D.T. et al. E2-RING expansion of the NEDD8 cascade confers specificity to cullin  
687 modification. *Mol Cell* **33**, 483-495 (2009).
- 688 24. Kohroki, J., Nishiyama, T., Nakamura, T. & Masuho, Y. ASB proteins interact with Cullin5  
689 and Rbx2 to form E3 ubiquitin ligase complexes. *FEBS Lett* **579**, 6796-6802 (2005).
- 690 25. Lowe, N. et al. Analysis of the expression patterns, subcellular localisations and interaction  
691 partners of Drosophila proteins using a pigP protein trap library. *Development* **141**, 3994-4005  
692 (2014).
- 693 26. Collins, M.O. et al. Molecular characterization and comparison of the components and  
694 multiprotein complexes in the postsynaptic proteome. *J Neurochem* **97 Suppl 1**, 16-23 (2006).
- 695 27. Antonyamy, S. et al. Crystal structure of the human PRMT5:MEP50 complex. *Proc Natl Acad*  
696 *Sci U S A* **109**, 17960-17965 (2012).
- 697 28. Scoumanne, A., Zhang, J. & Chen, X. PRMT5 is required for cell-cycle progression and p53  
698 tumor suppressor function. *Nucleic Acids Res* **37**, 4965-4976 (2009).
- 699 29. Gu, Z. et al. The p44/wdr77-dependent cellular proliferation process during lung development  
700 is reactivated in lung cancer. *Oncogene* **32**, 1888-1900 (2013).
- 701 30. Rost, H.L. et al. TRIC: an automated alignment strategy for reproducible protein quantification  
702 in targeted proteomics. *Nat Methods* **13**, 777-783 (2016).
- 703 31. R., Q. C4.5: Programs for Machine Learning. (Morgan Kaufmann Publishers, 1993).
- 704 32. Breiman, L. Random forests. *Mach Learn* **45**, 5-32 (2001).
- 705 33. John, G.H. & Langley, P. in Eleventh Conference on Uncertainty in Artificial Intelligence 338-  
706 345 (Morgan Kaufmann, 1995).
- 707 34. Cortes, C. & Vapnik, V. Support-Vector Networks. *Mach Learn* **20**, 273-297 (1995).
- 708 35. Lecessie, S. & Vanhouwelingen, J.C. Ridge Estimators in Logistic-Regression. *Appl Stat-J Roy*  
709 *St C* **41**, 191-201 (1992).
- 710 36. Vert, J.P., Tsuda, K. & Schoelkopf, B. in Kernel Methods in Computational Biology 35-70  
711 (MIT Press, Cambridge, MA, USA; 2004).
- 712 37. Pedregosa, F. et al. Scikit-learn: Machine Learning in Python. *J Mach Learn Res* **12**, 2825-2830  
713 (2011).
- 714 38. E., F., M.A., H. & I.H., W. The WEKA Workbench. Online Appendix for "Data Mining:  
715 Practical Machine Learning Tools and Techniques", Edn. Fourth Edition. (Morgan Kaufmann,  
716 2016).
- 717 39. Ashburner, M. et al. Gene ontology: tool for the unification of biology. The Gene Ontology  
718 Consortium. *Nat Genet* **25**, 25-29 (2000).
- 719 40. Carbon, S. et al. AmiGO: online access to ontology and annotation data. *Bioinformatics* **25**,  
720 288-289 (2009).
- 721 41. The Gene Ontology, C. The Gene Ontology Resource: 20 years and still GOing strong. *Nucleic*  
722 *Acids Res* **47**, D330-D338 (2019).
- 723 42. Wang, J.Z., Du, Z., Payattakool, R., Yu, P.S. & Chen, C.F. A new method to measure the  
724 semantic similarity of GO terms. *Bioinformatics* **23**, 1274-1281 (2007).
- 725 43. UniProt, C. UniProt: a worldwide hub of protein knowledge. *Nucleic Acids Res* **47**, D506-D515  
726 (2019).
- 727 44. Bernardo, J.M. & Smith, A.F.M. Bayesian Theory. (John Wiley & Sons, Inc., 1994).
- 728 45. W., M. in The 9th Python in Science Conference 51-56 (2010).
- 729 46. A.A., H., D.A., S. & P.J., S. in The 7th Python in Science Conference (SciPy2008) (Pasadena,  
730 CA USA; 2008).
- 731 47. Hunter, J.D. Matplotlib: A 2D graphics environment. *Comput Sci Eng* **9**, 90-95 (2007).
- 732

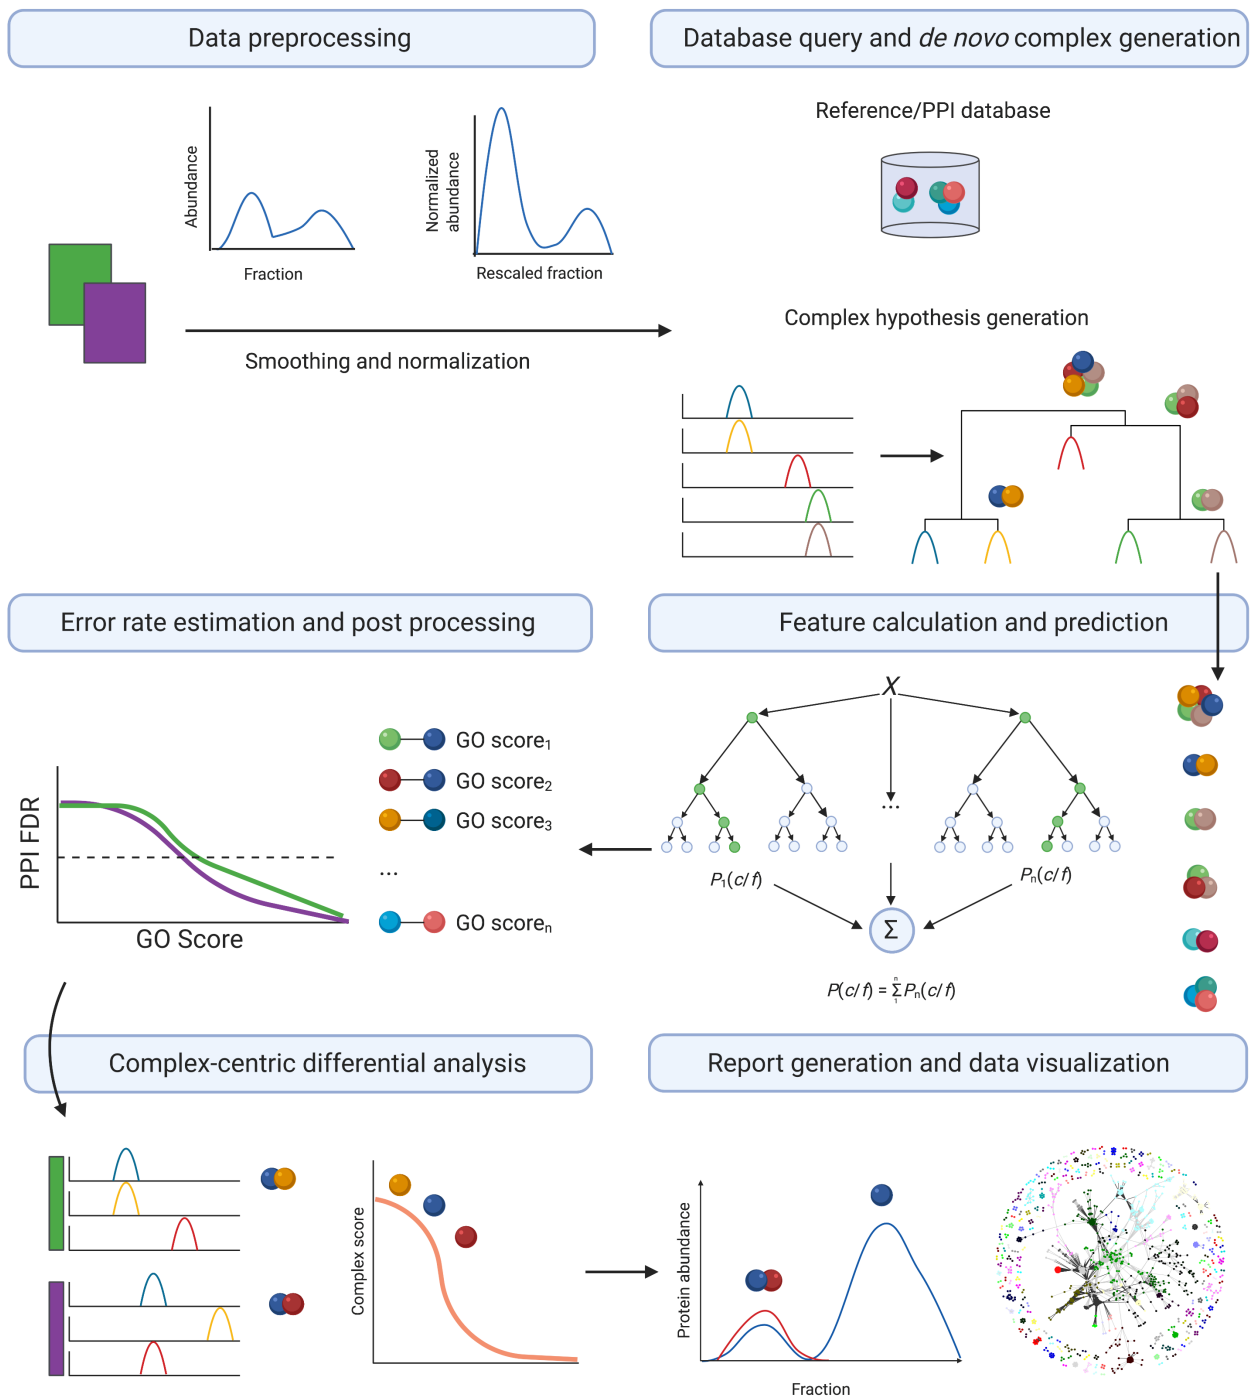

733  
 734 **Fig. 1.** The framework of PCprophet. It consists of the six major modules including (i) data pre-  
 735 processing, (ii) database query and *de novo* complex (i.e. hypothesis) generation, (iii) feature  
 736 calculation and prediction, (iv) error estimation and post-prediction processing, (v) complex-centric  
 737 differential analysis, and (vi) report generation and data visualisation.

738



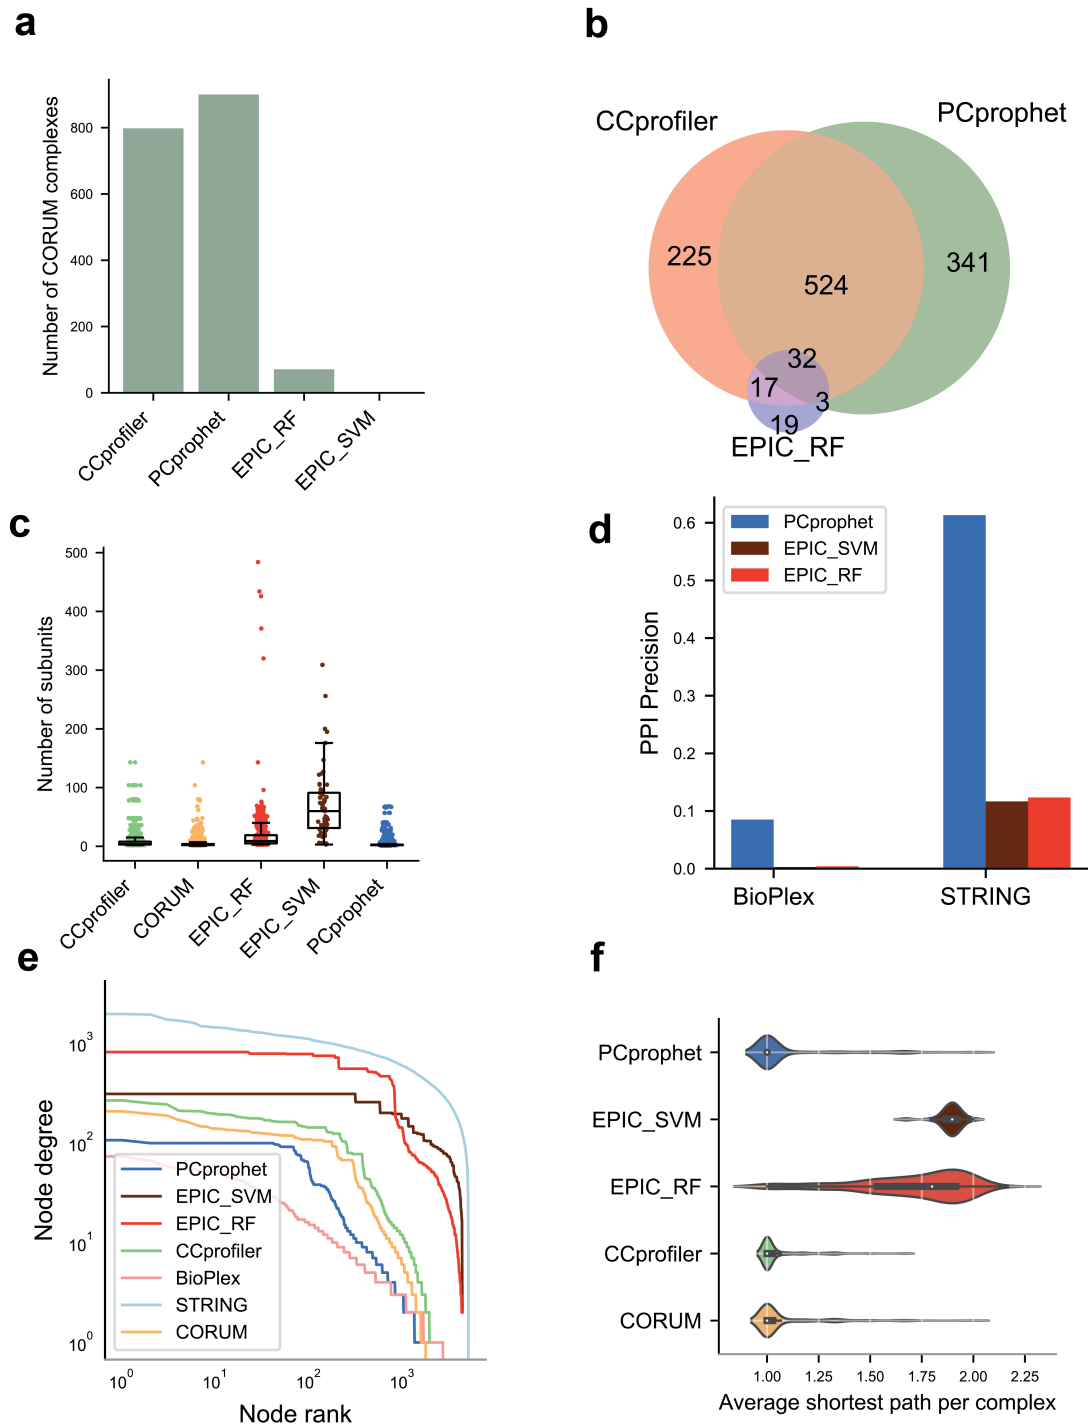

739  
 740 **Fig. 2.** Benchmarking PCprophet against existing tools for protein complex profiling and prediction. **a**,  
 741 The numbers of CORUM complexes recovered and the numbers of overlapping complexes by the  
 742 assessed tools. **b**, Absolute number of CORUM complexes recovered by each tool. **c**, Number of  
 743 subunits per complex predicted and identified by different tools. Boxplot shows the medians and the  
 744 ticks represent standard deviation. **d**, The precision values (refer to the ‘Methods’ section for more  
 745 details) of PPI prediction for *de novo* protein complex prediction tools. **e**, Log-log plot showing the  
 746 degree distribution of the network generated by each tool *versus* ground-truth databases (STRING,  
 747 BioPlex and CORUM). **f**, Distribution of shortest path per complex across all subunits, as reported by  
 748 the indicated tools. The medians are highlighted in white dots.



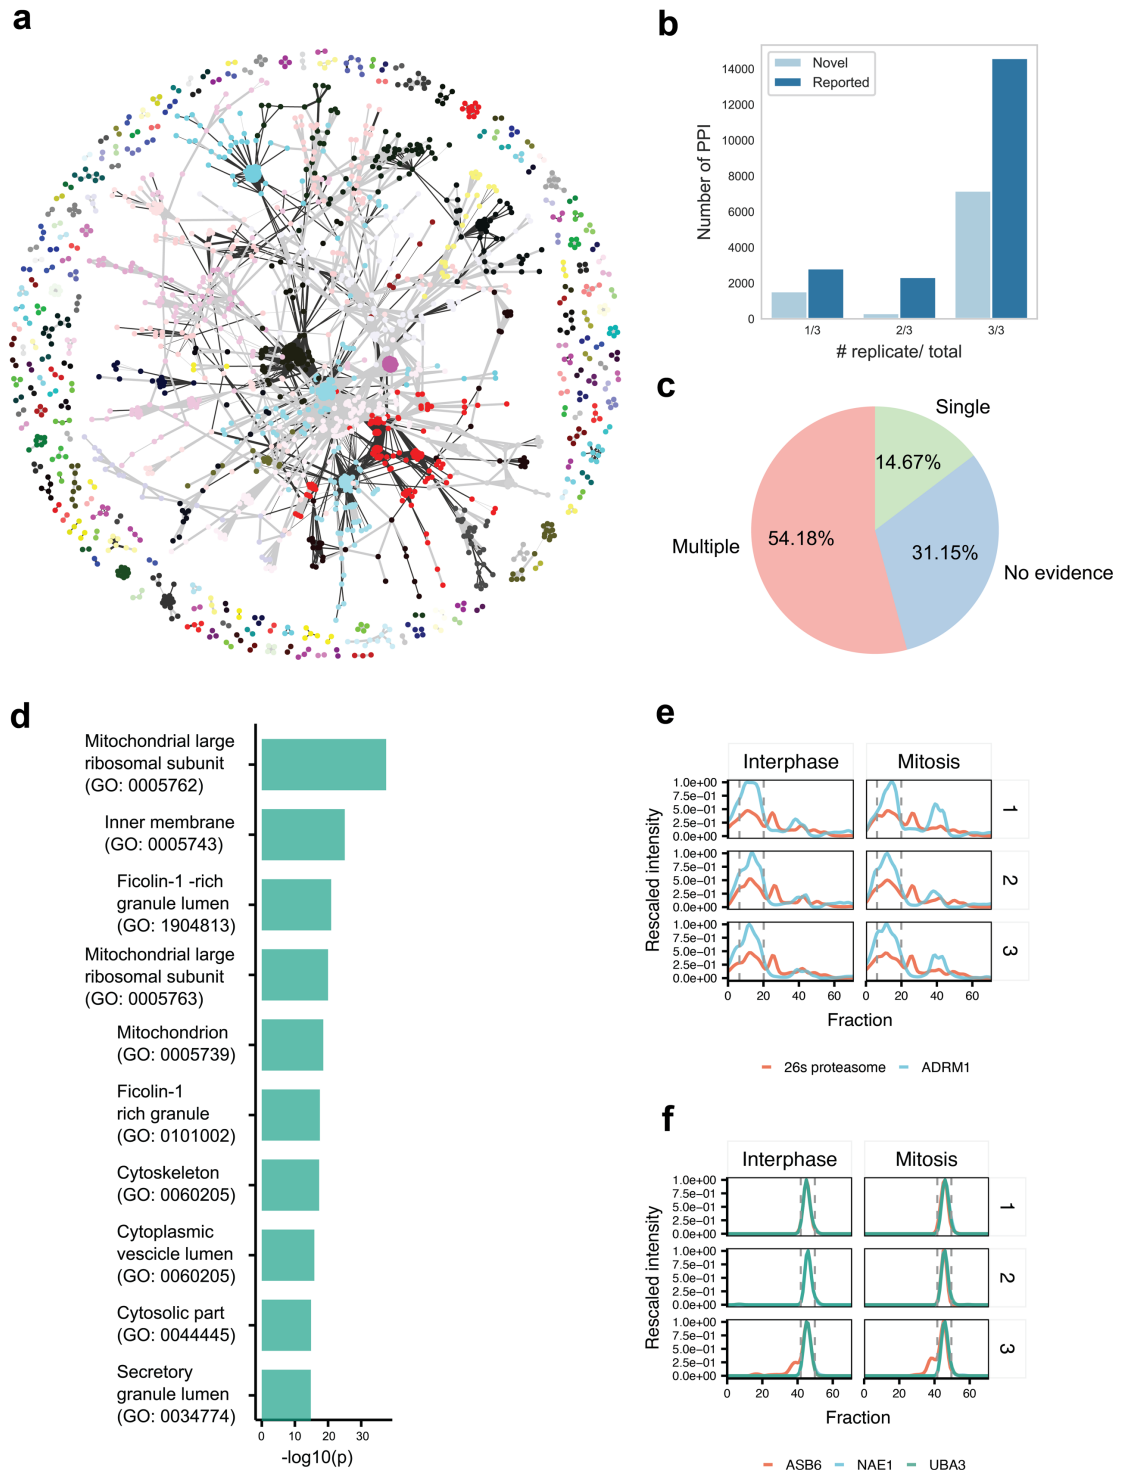

749  
 750 **Fig. 3.** Evaluation of *de novo* prediction using PCprophet. **a**, The PPI map generated by PCprophet  
 751 from HeLa cell proteomic data. Edge width represents the number of technical replicates for which a  
 752 particular PPI was found. Black edge are novel PPIs and grey edges are reported PPIs. Protein  
 753 communities are highlighted in different node colours. **b**, Number of novel and reported PPIs across  
 754 all conditions within technical replicates (i.e. interphase and mitosis). **c**, Annotation of novel PPIs (i.e.  
 755 not documented in the CORUM databases) in PPI databases (STRING, BioPlex, BioGrid). **d**,  
 756 Enrichment analysis for GO Cellular Component for PPIs without prior evidence in any database. **e**,  
 757 26S proteasome and ADRM1 coelution from interphase and mitotic cells. **f**, Co-elution of ASB6 with  
 758 the NAE1 and UBA3 complex.

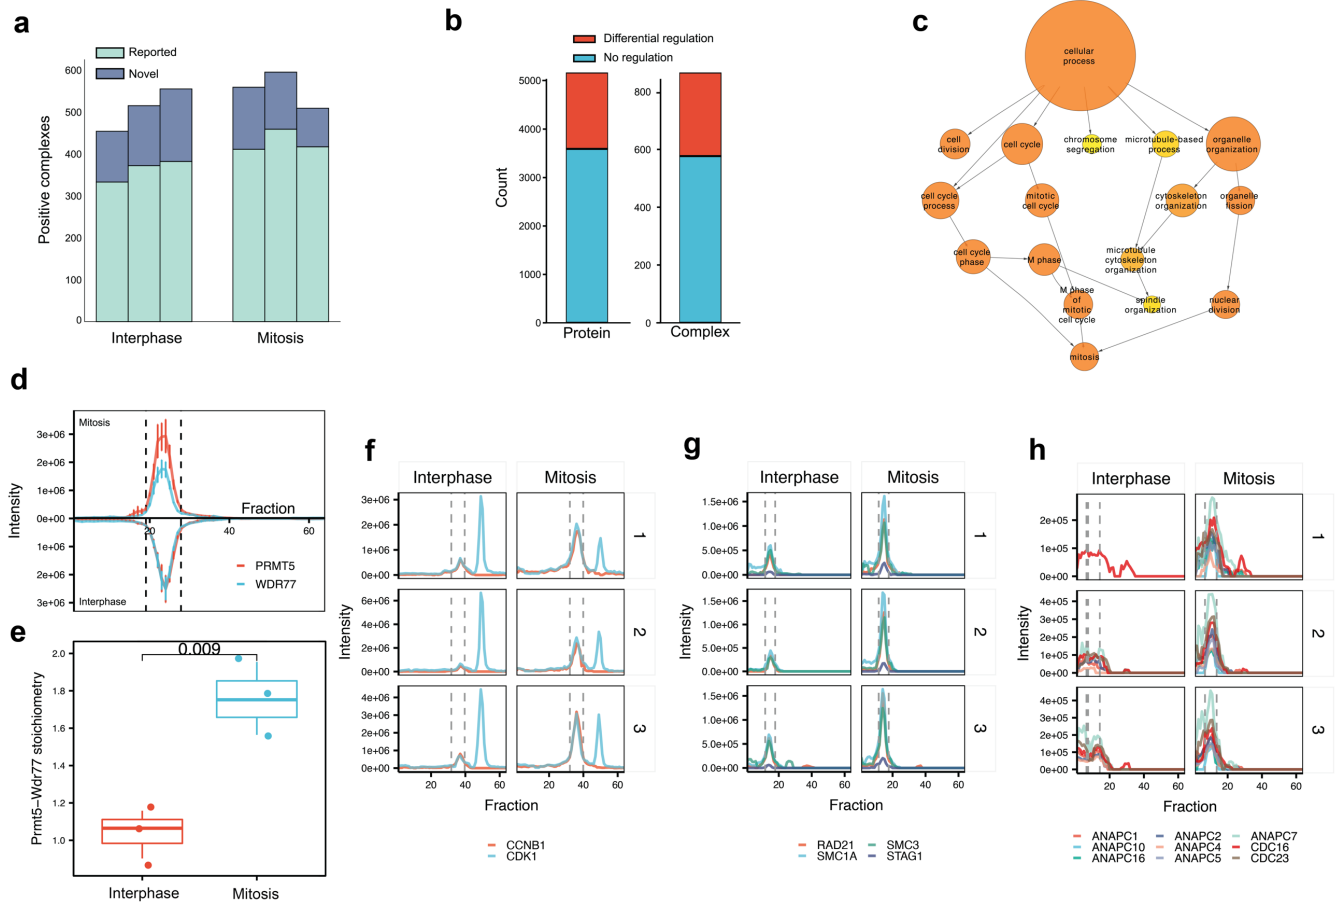

759  
 760 **Fig. 4.** Differential analysis of complexes across the cell cycle states tested. **a**, Absolute number of  
 761 novel and reported complexes in the indicated cell cycle stages. **b**, Stacked histogram for differentially  
 762 regulated proteins (n=1518) and differentially regulated complexes (n=238). **c**, Enrichment for GO  
 763 Biological Process for differentially regulated proteins between the two conditions using as background  
 764 all proteins identified. Node size represents number of proteins within the particular category. Nodes  
 765 colour represents Bonferroni adjusted  $p$  value, ranging from  $p=10^{-3}$  (yellow) to  $p=10^{-8}$  (orange). **d**,  
 766 Mirror plot for co-elution profiles of Prmt5-Wdr77 complex in mitosis (upper positive Y axis) and  
 767 interphase (negative y axis). Values were averaged across the three replicates for each condition and  
 768 bar represents standard error of the mean. **e**, Bar-plot of Prmt5/Wdr77 complex stoichiometry in  
 769 interphase (red, mean=1.04) and mitosis (blue, mean=1.75). **f**, Co-elution profile for the Ccnb1/CKD1  
 770 complex **(G)** Co-elution profile for the Anaphase promoting complex. **h**, Co-elution profile for the  
 771 cohesion complex.

## 772 **Supplementary Methods**

### 773 **Mathematical details for Bayesian inference of differential regulation of protein abundance and** 774 **protein complexes**

775 We now present further mathematical details how we may express the marginal likelihoods in  
776 Equations (15) and (16). We start this derivation by expressing the prior densities over  $\Lambda$  and  $\mu$  for the  
777 simpler model  $I_p = 0$  and the densities over  $\mu_\tau \forall \tau$  for the more complex model  $I_p = 1$ . As is mentioned  
778 above, the prior over the precision matrix  $\Lambda$  is coded as a product of Gamma densities. With  $\Lambda =$   
779  $diag([\lambda_1, \dots, \lambda_D])$  and  $D$  denoting the input dimension (number of columns) of  $X$  we get

$$p(\Lambda|g, h) = \prod_{d=1}^D \left( \frac{h^g}{\Gamma(g)} \lambda_d^{g-1} \exp(-h\lambda_d) \right), \quad (19)$$

780  
781 where  $\Gamma(g) = \int_{x=0}^{\infty} x^{g-1} \exp(-x) dx$  denotes the Gamma function. The multivariate Gaussian prior  
782 over  $\mu$  for the non-differentially regulated case  $I_p = 0$  is

$$p(\mu|\Lambda, \gamma, m) = (2\pi)^{-\frac{D}{2}} \gamma^{\frac{D}{2}} \|\Lambda\|^{-\frac{1}{2}} \exp(-0.5\gamma(\mu - m)^T \Lambda(\mu - m)), \quad (20)$$

783  
784 where  $\|\Lambda\|$  denotes the determinant of the precision matrix. Finally, we get the multivariate Gaussian  
785 prior over  $\mu$  for the differentially regulated case  $I_p = 1$  as

$$p(\mu|\Lambda, \gamma, m) = \prod_{\tau=1}^{\#t} \left( (2\pi)^{-\frac{D}{2}} \gamma^{\frac{D}{2}} \|\Lambda\|^{-\frac{1}{2}} \exp(-0.5\gamma(\mu_\tau - m)^T \Lambda(\mu_\tau - m)) \right). \quad (21)$$

786  
787 To calculate the marginal likelihood for the model  $I_p = 1$  we integrate Equation (13) first with respect  
788 to all  $\mu_\tau$  and then with respect to  $\Lambda$  to get

$$p(\mathbf{X}|\mathbf{t}, \gamma, m, g, h, I_p \equiv 1) = \left( \frac{h^g}{\Gamma(g)} \right)^D (2\pi)^{-\frac{D \cdot N}{2}} \gamma^{\frac{D \cdot \#t}{2}} \prod_{\tau=1}^{\#t} (\gamma + n_\tau)^{-\frac{D}{2}} \prod_{d=1}^D \Gamma(\hat{g}) / \hat{h}_d^{\hat{g}}, \text{ where}$$

$$\hat{g} = g + \frac{N}{2}, \quad (22)$$

$$\hat{h}_d = h + 0.5 \left( \mathbf{t} \gamma m_d^2 + \sum_{n=1}^N x_{n,d}^2 - \sum_{\tau=1}^{\#t} (\xi_d^\tau)^2 / \gamma + n_\tau \right),$$

$$\xi^\tau = \gamma m + \sum_{n|t_n=\tau} x_n,$$

789

790 and we use  $N$  to denote the number of all samples and  $n_\tau$  to denote the number of samples which have  
791 phenotype level  $\tau$ . The final expression for the marginal likelihood of the simpler model  $I_p = 0$  from  
792 Equation (16) is easily obtained from Equation (22). We just have to replace  $n_\tau$  with  $N$  and  $\#t$  with 1.  
793 We should note that for numerical stability we calculate  $\log(p(X|t, \gamma, m, g, h, I_p))$ . The calculations  
794 reported in this paper set the hyper parameters for  $g$ ,  $h$  and  $\gamma$  to  $g = 0.8$ ,  $h = 1.5$  and  $\gamma = 0.025$ . As prior  
795 location  $m$  we use the sample mean or set  $m = 0$ .  
796

## 797 **Supplementary Results**

### 798 **Optimization of PCprophet machine learning framework for complex prediction**

799 In order to reach optimal performance in correctly classifying protein complex signals from the co-  
800 fractionation datasets, we explored different types of machine learning strategies and their performance  
801 to recall a set of manually curated protein complex signals in a previously published dataset<sup>10</sup>. To train  
802 the machine learning models, we used manually annotated data (refer to the ‘**Methods**’ section for  
803 more details) using criteria similar to the strategy applied in Heusel *et al*<sup>10</sup>. As the negative complexes  
804 significantly outnumbered the positive complexes (i.e. 738 vs. 242) based on our manual annotation,  
805 we evaluated the performance of PCprophet on two instances of the input dataset: one where all the  
806 negatives were used and the other where an equal number of negatives as positives were randomly  
807 selected. We tested the performance of PCprophet based on five well-established machine learning  
808 models using five-fold cross-validation including Decision Tree (J48)<sup>31</sup>, Random Forest<sup>32</sup> (RF), Naïve  
809 Bayes<sup>33</sup> (NB), Support Vector Machines<sup>34</sup> (SVM) and Logistic Regression<sup>35</sup> (LR) algorithms [Figure  
810 comparing the performance of the different algorithms. We determined that the RF achieved its best  
811 performance when the number of trees was set to 500 via a separate stratified 10-fold cross-validation  
812 on the entire dataset (**Supplementary Fig. S8**); for all other algorithms, we used default parameters. In  
813 the latter dataset, we performed 100 trials for this random selection procedure (**Supplementary Table**  
814 **S4**). RF outperformed all the other machine-learning algorithms and selected as the algorithm for  
815 PCprophet, for example, achieving an AUC of 0.991, accuracy of 96.9% and MCC of 0.916,  
816 irrespective of the number of negative complexes used (**Supplementary Fig. 9; Supplementary Table**  
817 **S4**). To build a balanced and unbiased classifier, we rebuilt the RF model on the dataset with equal  
818 positive and negative complexes, on which RF achieved the best performance according to the 100  
819 trials of 5-fold cross-validation. This rebuilt RF model is then used as the core predictor for PCprophet.

820 **Supplementary Figures**

821

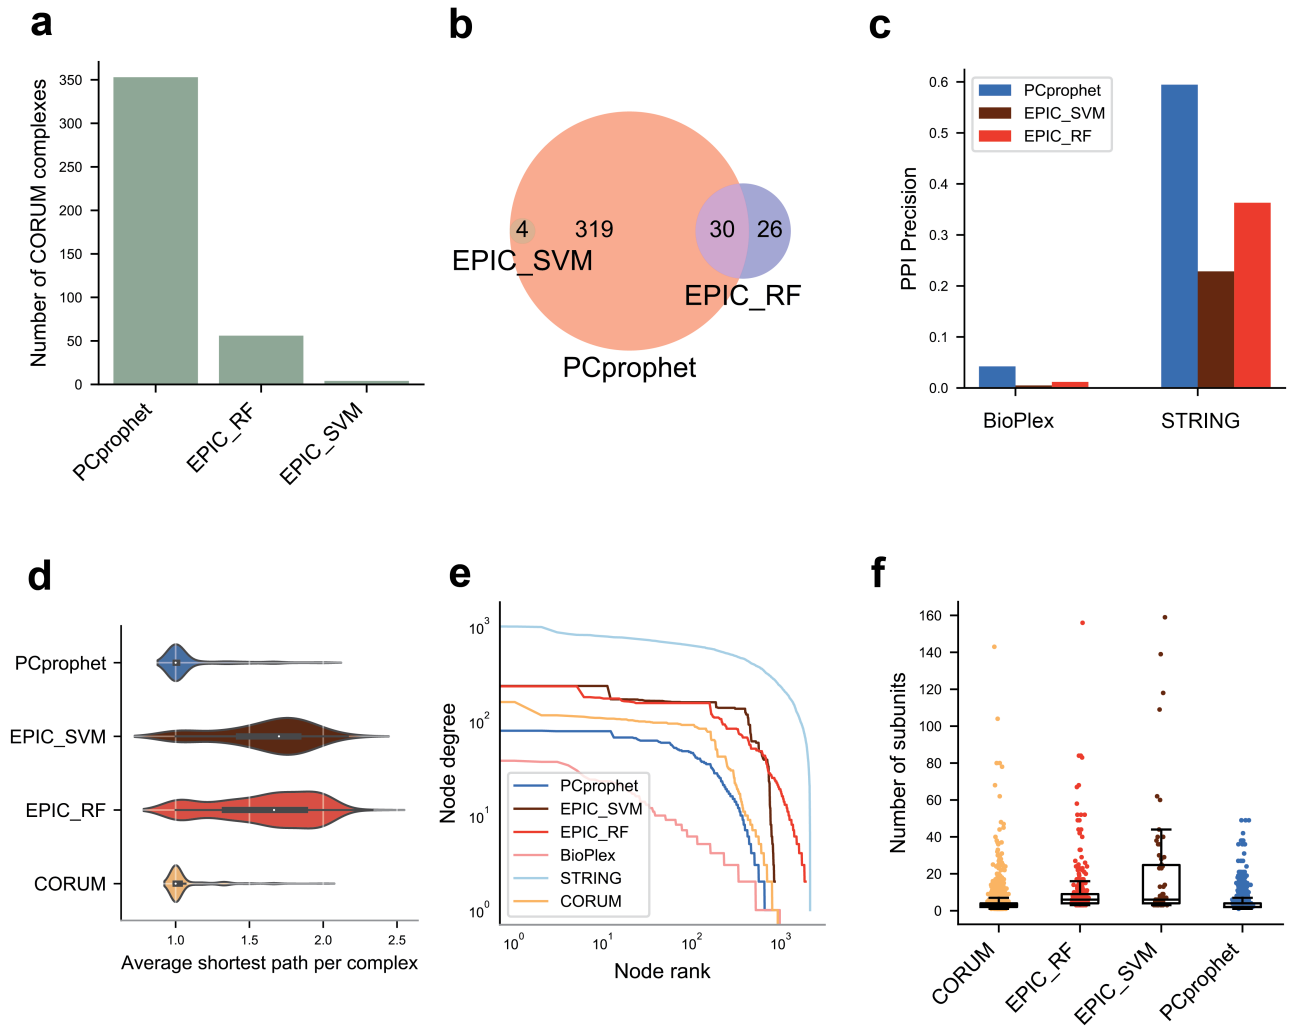

822

823 **Supplementary Fig. S1.** Benchmarking PCprophet with state-of-the-art software for complex profiling  
824 on the DDA-SILAC dataset. **a**, Absolute number of CORUM complexes recovered by each tool. **b**,  
825 Complex IDs overlap across all tools. **c**, Precision of PPI prediction for *de novo* protein complex  
826 prediction tools. **d**, Distribution of shortest path per complex across all subunits. The medians are  
827 highlighted using the white dots. **e**, Log-log plot showing the topology of the network generated by  
828 each tool *versus* ground-truth databases. **f**, Number of subunits per complex across different tools.  
829 Boxplot shows the medians and the ticks represent standard deviation.

830

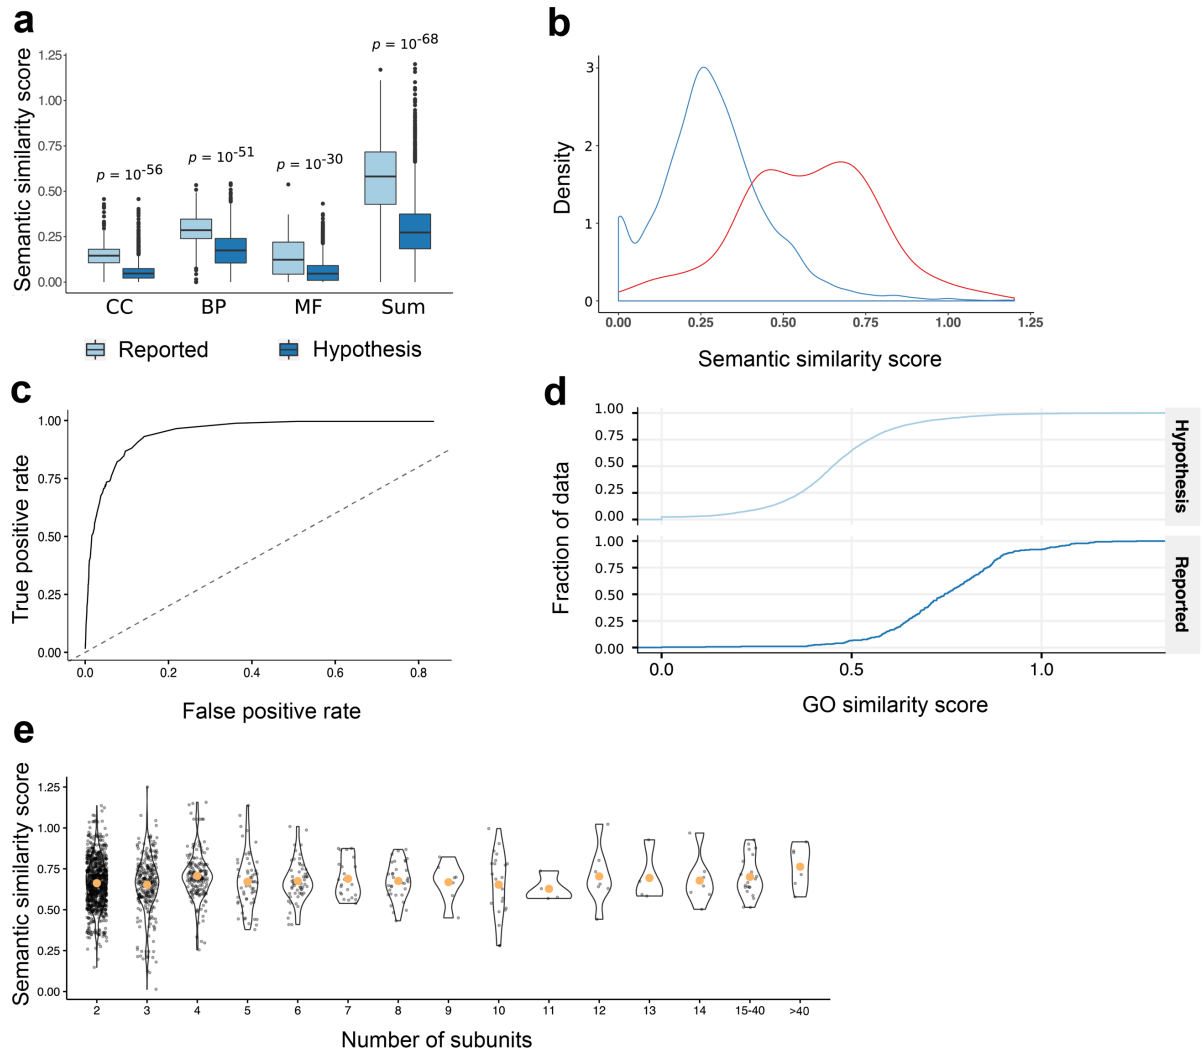

831

832 **Supplementary Fig. S2.** Evaluation of GO score for estimating the false discovery rate. **a**, The boxplot

833 illustrating the separation of hypothesis and CORUM using the three individual ontologies or the

834 combination of the three (i.e. Molecular Function – MF; Biological Process – BP; Cellular Component

835 – CC). **b**, The density plot showing the separation of hypothesis and ground-truth CORUM database

836 using the sum of the three ontologies. **c**, Performance of GO term for separation of true and false PPIs.

837 **d**, Empirical cumulative distribution plot between hypothesis and reported complexes from CORUM.

838 **e**, Distribution of the sum of the three GO ontologies across different subunits size for reported

839 complexes.



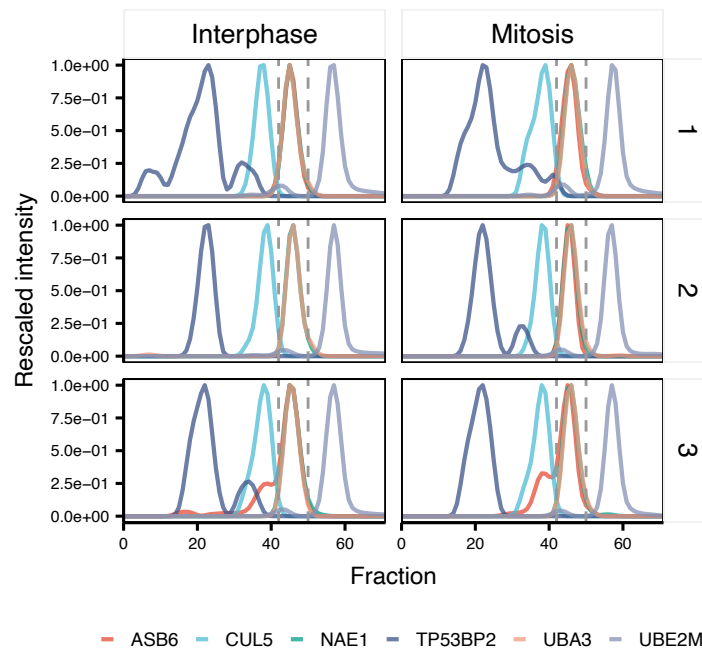

840  
841 **Supplementary Fig. S3.** Elution profiles of reported binders for ABS6 (CUL5) and NAE1-UBA3  
842 (TP53BP2, UBE2M) across the two experimental conditions and the three replicates. The region  
843 between the dotted lines represent the peak position of the novel ASB6-UBA3-NAE1 complex. The  
844 absence of coelution of reported interactors between the dotted lines suggests the presence of a novel  
845 complex rather than co-occurrence of complexes of similar size.

846  
847

848

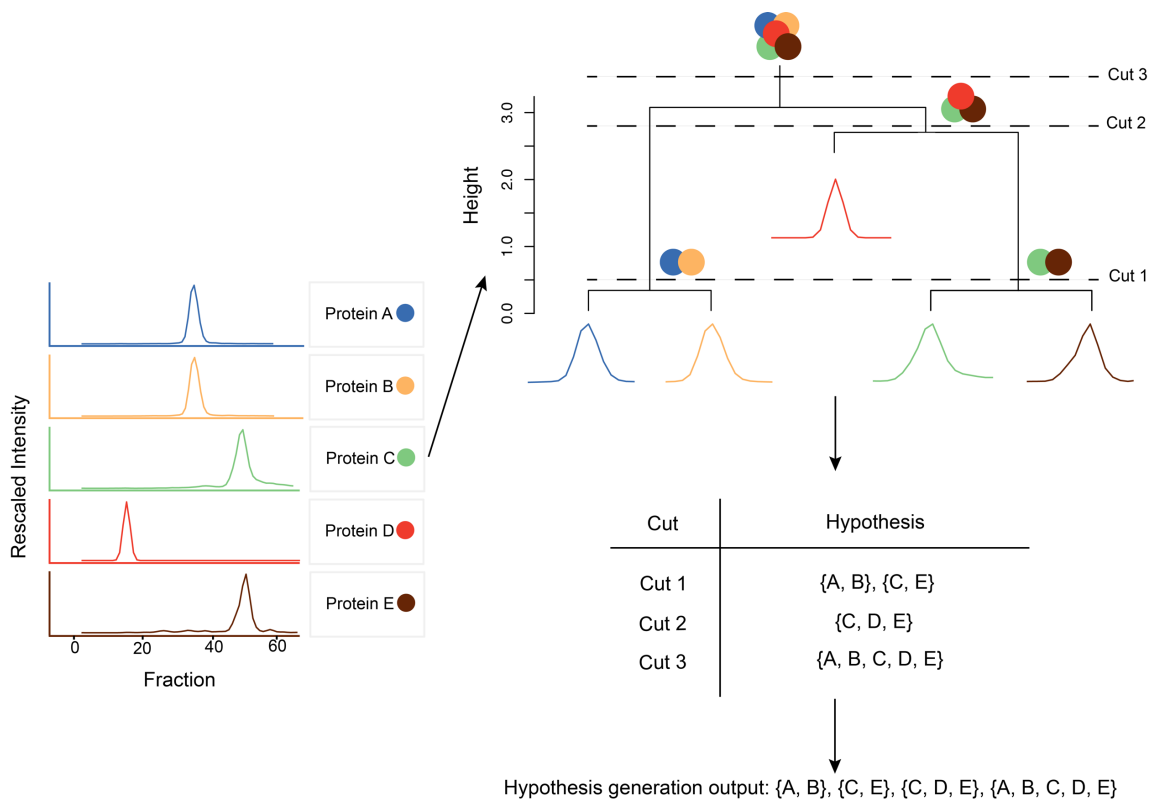

849

850 **Supplementary Fig. S4.** A conceptual illustration of hypothesis generation. Every protein is clustered  
851 into possible complexes using Euclidian distance clustering. Following construction of a dendrogram,  
852 all resulting clusters are retrieved by cutting at all heights (i.e. distances). This generates a  
853 comprehensive set of all possible complexes in the data.

854

855

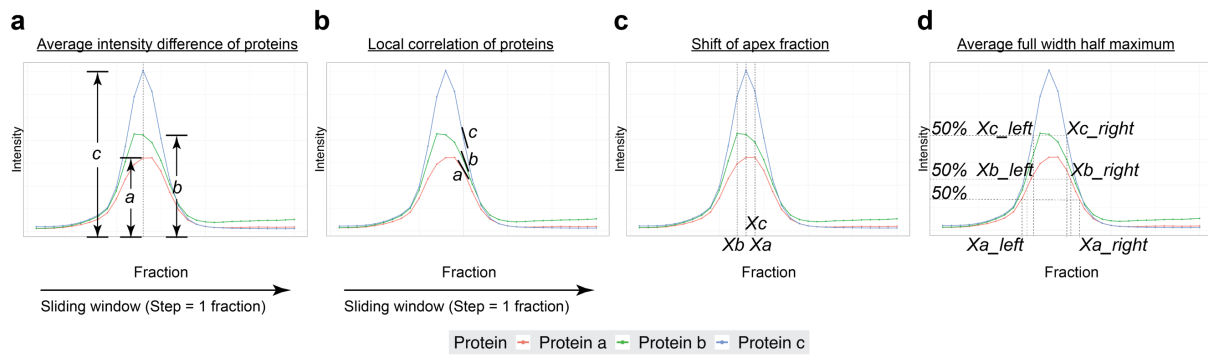

856

857 **Supplementary Fig. S5.** Feature calculation based on protein co-elution profiles. **a**, average intensity  
858 difference of proteins. **b**, local correlation of proteins at each fraction. **c**, shift of apex fraction. **d**,  
859 average full width half maximum.

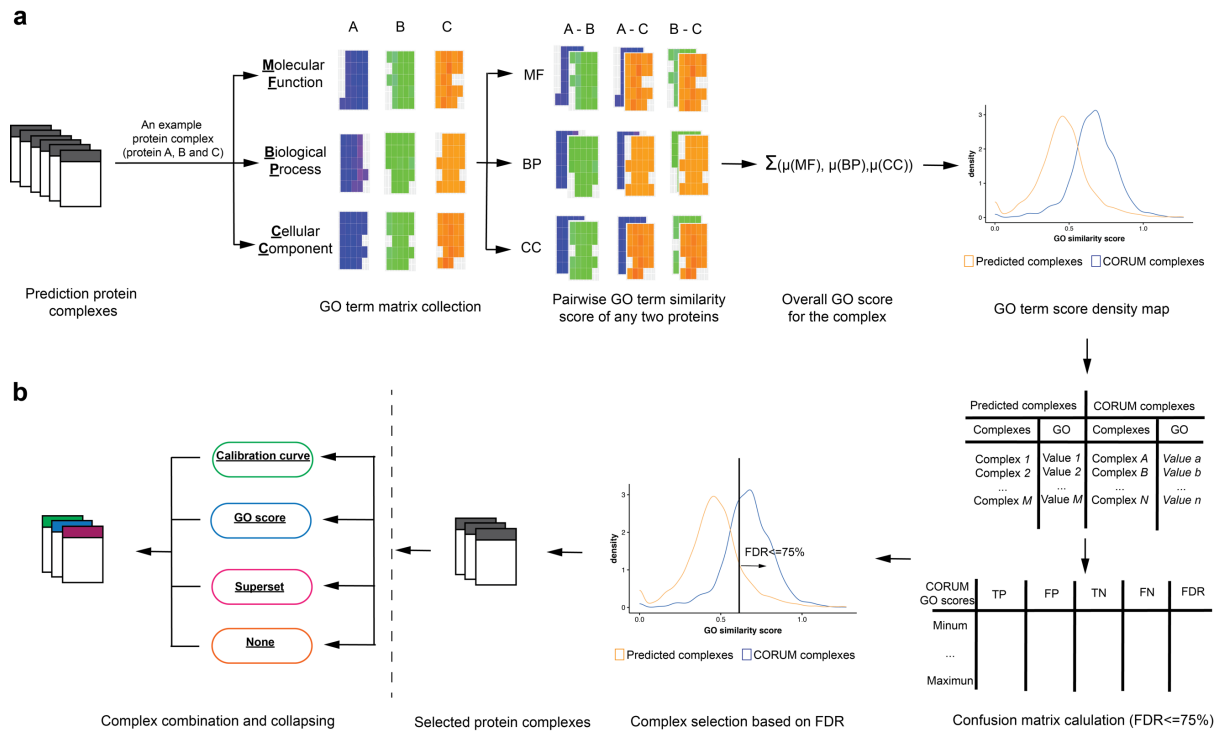

860

861 **Supplementary Fig. S6.** Graphical illustration of post-prediction processing. **a**, GO term score filtering.

862 **b**, complex combination and collapsing. Positively predicted complexes either from the provided

863 database or PCprophet are decomposed into PPI and pairwise metrics are calculated based on semantic

864 similarity between the different ontologies which is then filtered based on a user-defined FDR threshold.

865 Overlapping complexes are combined based on the user-defined criteria.

866

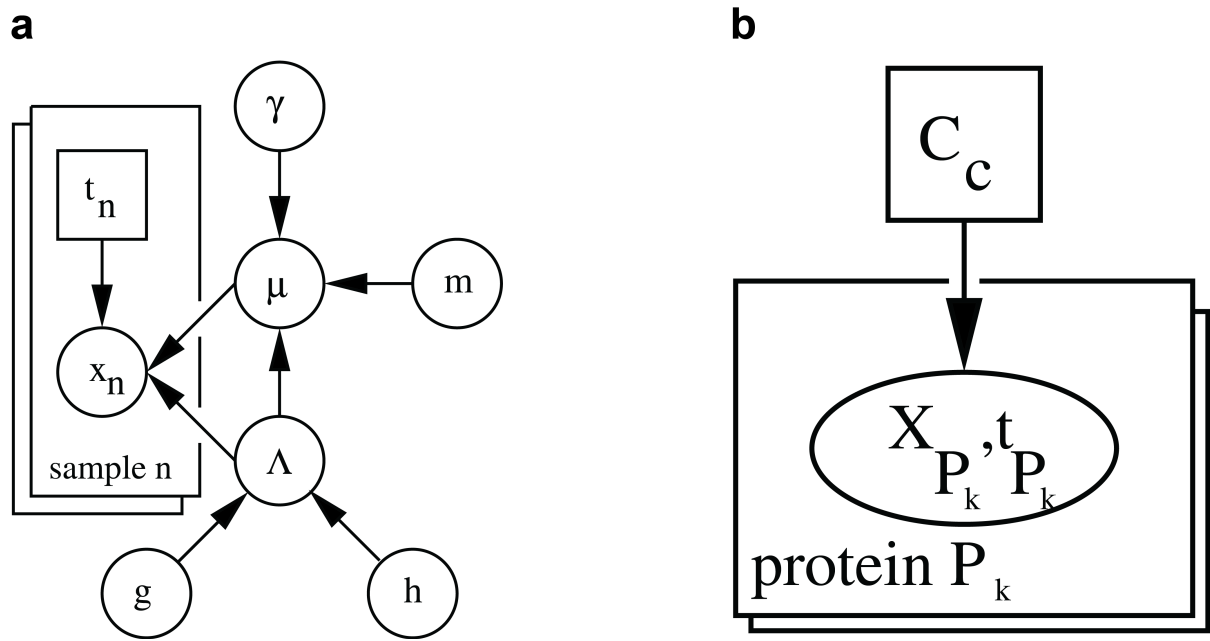

867  
868

869 **Supplementary Figure S7.** Using Bayesian inference to analyse the difference of protein complexes  
870 across conditions. **a**, An analytically tractable model for inferring differentially regulated proteins.  
871 Variable  $\mu$  denotes the mean of a multivariate Gaussian distribution over the protein abundance vector  
872  $x_n$  which depends on the phenotype state  $t_n$ . The prior over  $\mu$  is a Gaussian distribution and  
873 parameterized by  $m$  (the prior location),  $\Lambda$  and  $\gamma$  (together specifying the precision of the Gaussian  
874 distribution). Variable  $\Lambda$  acts also as a precision matrix in the Gaussian  $p(x_n|\mu, \Lambda)$ . The prior over  $\Lambda$   
875 is a diagonal Wishart distribution (a product of Gamma distributions) which is parameterised by the hyper  
876 parameters  $g$  and  $h$ . The conditional distribution  $p(\mu, \Lambda|g, h, m, \gamma)$  which is represented by this DAG is  
877 referred to as Normal-Wishart distribution and allows for an analytical calculation of Bayes factors. **b**,  
878 A probabilistic model for inferring differentially regulated protein complexes. Variable  $C_c$  denotes the  
879 state of differential regulation of a protein complex as binary variable. The elliptic node  $X_{P_k}, t_{P_k}$   
880 represents the marginal likelihood of the protein retention profiles  $X_{P_k}$  of protein  $P_k \in C_c$  in  
881 dependence of the phenotype characterization  $t_{P_k}$  as they arise from Equation (15) for  $C_c = 1$  and from  
882 Equation (16) for  $C_c = 0$ . For calculating the state of differential regulation of protein complex  $C_c$  we  
883 make thus a conditional independence assumption among all contributing marginal likelihoods.  
884

885

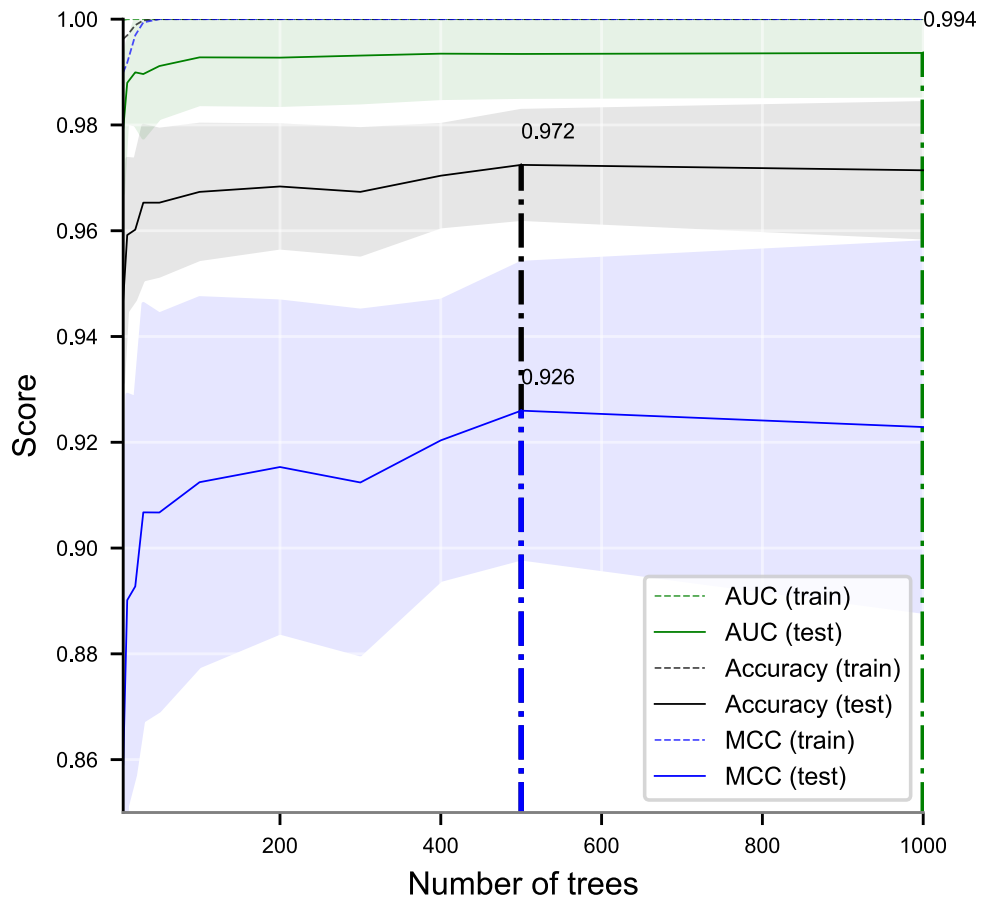

886  
887 **Supplementary Fig. S8.** Determination of the number of trees in the RF model using three  
888 performance evaluation measures, including accuracy, AUC and MCC, via stratified 10-fold cross-  
889 validation on the entire dataset.

890

891

892

893

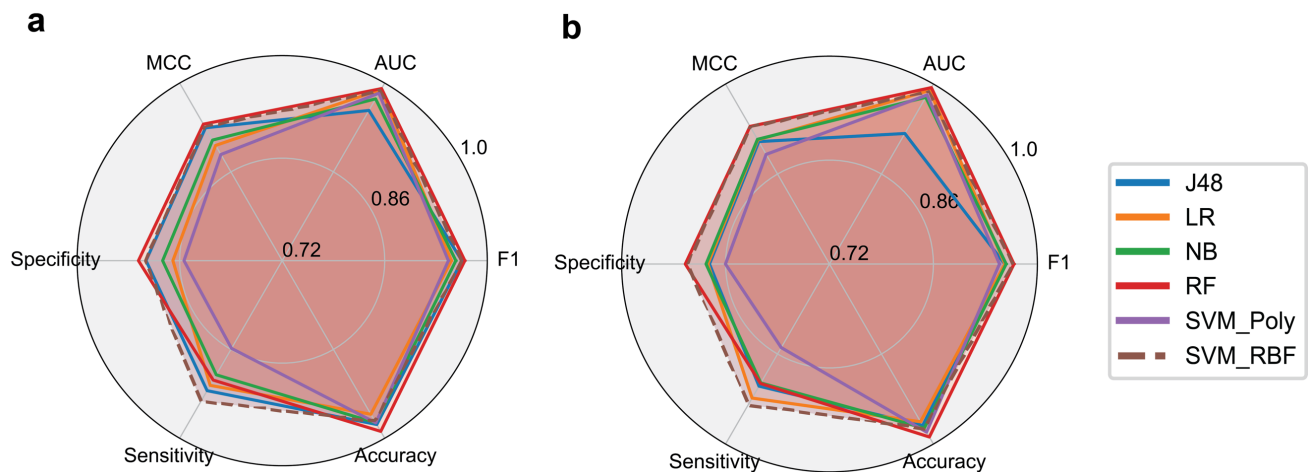

894

895 **Supplementary Fig. S9.** Radar plots demonstrating the prediction performance of PCprophet

896 via five-fold cross-validation. Performance parameters are AUC, accuracy, F1, MCC,

897 sensitivity and specificity. The analysis was based on the HEK293 dataset<sup>10</sup> using **a**, equal

898 numbers of positives and negatives, which were randomly selected 100 times and **b**, positives

899 and all negatives. Coloured lines show the performance measures of different machine-learning

900 algorithms namely J48 decision tree (J48), linear regression (LR), Naïve Bayes (NB), Random

901 Forest (RF) and Support Vector Machine with either polynomial kernel (SVM\_Poly) or radial

902 basis function kernel (SVM\_RBF)

903



904 **Supplementary Tables**

905 **Supplementary Table S1.** AUC values evaluating the similarity between ground-truth  
906 networks and prediction

907

908

| AUC               | Software | $\Delta$ AUC |
|-------------------|----------|--------------|
| <b>PCprophet</b>  | 0.096    | 0.013        |
| <b>EPIC_SVM</b>   | 0.390    | 0.282        |
| <b>EPIC_RF</b>    | 0.175    | 0.067        |
| <b>CCprofiler</b> | 0.122    | 0.014        |
| <b>BioPlex</b>    | 0.040    | 0.068        |
| <b>STRING</b>     | 0.137    | 0.029        |
| <b>CORUM</b>      | 0.109    | 0            |

909

910 **Supplementary Table S2.** Detailed descriptions of the datasets applied for training and  
911 evaluating PCprophet

| <b>Dataset</b>                                  | <b>Cell line</b> | <b>Species</b>      | <b>Data acquisition method</b> | <b>Separation technique</b>         |
|-------------------------------------------------|------------------|---------------------|--------------------------------|-------------------------------------|
| <b>HEK293<sup>10</sup></b>                      | HEK293           | <i>Homo sapiens</i> | SWATH                          | SEC (Size Exclusion Chromatography) |
| <b>HeLa mitosis and interphase<sup>17</sup></b> | HeLa CCL2        | <i>Homo sapiens</i> |                                |                                     |
| <b>DDA-SILAC HeLa<sup>18</sup></b>              | HeLa             | <i>Homo sapiens</i> | DDA-SILAC                      |                                     |

912

913 **Supplementary Table S3.** An example demonstrating the complex collapsing step using three

914 protein complexes

| <b>Complex</b> | <b>Subunit</b> | <b>GO score</b> | <b>Calibration MW</b> | <b>Apparent MW</b> |
|----------------|----------------|-----------------|-----------------------|--------------------|
| <b>PC1</b>     | A, B           | 0.5             | 150,000               | 100,000            |
| <b>PC2</b>     | A, B, C        | 0.9             | 150,000               | 130,000            |
| <b>PC3</b>     | A, B, C, D     | 0.7             | 150,000               | 160,000            |

915

916 **Supplementary Table S4.** Prediction performance of PCprophet on manually annotated HEK293

917 datasets via 5-fold cross-validation using different numbers of negatives

|                 | AUC                                            | Accuracy       | F1           | MCC          | Specificity  | Sensitivity  |
|-----------------|------------------------------------------------|----------------|--------------|--------------|--------------|--------------|
|                 | Using equal numbers of positives and negatives |                |              |              |              |              |
| <b>J48</b>      | 0.957                                          | 96.531%        | 0.929        | 0.906        | 0.978        | 0.925        |
| <b>LR</b>       | 0.990                                          | 95.102%        | 0.902        | 0.869        | 0.962        | <b>0.917</b> |
| <b>NB</b>       | 0.975                                          | 95.714%        | 0.910        | 0.883        | 0.976        | 0.900        |
| <b>RF</b>       | <b>0.991</b>                                   | <b>96.939%</b> | <b>0.935</b> | <b>0.916</b> | <b>0.989</b> | 0.908        |
| <b>SVM_POLY</b> | 0.984                                          | 94.694%        | 0.887        | 0.854        | 0.976        | 0.858        |
| <b>SVM_RBF</b>  | 0.988                                          | 96.531%        | 0.931        | 0.907        | 0.973        | 0.942        |
|                 | Using positives and all negatives              |                |              |              |              |              |
| <b>J48</b>      | 0.923                                          | 95.603%        | 0.910        | 0.882        | 0.971        | 0.910        |
| <b>LR</b>       | 0.990                                          | 95.622%        | 0.913        | 0.884        | 0.965        | 0.929        |
| <b>NB</b>       | 0.979                                          | 95.796%        | 0.914        | 0.886        | 0.975        | 0.905        |
| <b>RF</b>       | <b>0.994</b>                                   | <b>97.268%</b> | <b>0.934</b> | <b>0.926</b> | <b>0.989</b> | 0.906        |
| <b>SVM_POLY</b> | 0.983                                          | 94.896%        | 0.891        | 0.860        | 0.981        | 0.850        |
| <b>SVM_RBF</b>  | 0.988                                          | 96.684%        | 0.933        | 0.911        | 0.976        | <b>0.939</b> |

918

919
